# Supplementary material
Source: publisher site journal article supplement (https://www.dovepress.com/get_supplementary_file.php?f=510347.docx)

**Supplementary information**

**Table S1** The proportion of IHD burden attribute to all risk factors in 2021

| Location | Deaths (95% CI) | DALYs (95% CI) |
| --- | --- | --- |
| Global | 91.67(88.44 to 93.36) | 92.27(88.88 to 93.95) |
| High SDI | 89.13(85.3 to 91.53) | 90.37(87.69 to 92.95) |
| High-middle SDI | 91.55(89.08 to 92.77) | 92.53(89.49 to 93.77) |
| Middle SDI | 91.92(90.15 to 92.95) | 91.81(89.44 to 92.96) |
| Low-middle SDI | 93.17(90.59 to 93.84) | 93.03(90.35 to 93.96) |
| Low SDI | 92.37(90.05 to 93.2) | 92.34(89.12 to 93.51) |

*DALYs:disability-adjusted life years; SDI: sociodemographic index; CI: confidence interval.*

**Table S2** IHD-related deaths (absolute numbers and percentages) associated with risk factors and their clusters in 2021

|  | Global | |  | High SDI | |  | High-middle SDI | |  | Middle SDI | |  | Low-middle SDI | |  | Low SDI | |
| --- | --- | --- | --- | --- | --- | --- | --- | --- | --- | --- | --- | --- | --- | --- | --- | --- | --- |
|  | Absolute number(thousands) | Percentage |  | Absolute number(thousands) | Percentage |  | Absolute number(thousands) | Percentage |  | Absolute number(thousands) | Percentage |  | Absolute number(thousands) | Percentage |  | Absolute number(thousands) | Percentage |
| **Environmental risks** |  |  |  |  |  |  |  |  |  |  |  |  |  |  |  |  |  |
| Ambient particulate matter pollution | 1729.55(1212.5 to 2286.98) | 20.98%(16.59 to 25.7) |  | 155.16(102.51 to 209.32) | 12.5%(9.87 to 15.36) |  | 495.57(344.04 to 651.79) | 22.09%(17.41 to 26.54) |  | 699.85(464.57 to 923.95) | 27.08%(20.09 to 32.88) |  | 329.36(201.05 to 462.86) | 19.27%(13.06 to 25.11) |  | 48.07(30.17 to 70.77) | 10.55%(7.48 to 13.98) |
| Household air pollution from solid fuels | 762.84(412.88 to 1370.92) | 9.26%(5.65 to 15.41) |  | 0.83(0 to 8.01) | 0.07%(0 to 0.59) |  | 37.82(2.72 to 185.46) | 1.69%(0.14 to 7.55) |  | 180.18(42.03 to 459.34) | 6.97%(1.82 to 16.35) |  | 372.39(222.16 to 544.44) | 21.79%(14.43 to 29.54) |  | 171.06(131.69 to 211.46) | 37.53%(32.63 to 41.78) |
| High temperature | 112.39(17.05 to 256.43) | 1.36%(0.23 to 2.88) |  | 9.19(-0.48 to 28.53) | 0.74%(-0.05 to 2.09) |  | 13.44(-3.34 to 46.86) | 0.6%(-0.17 to 1.91) |  | 36.66(6.11 to 82.78) | 1.42%(0.26 to 2.95) |  | 45.83(12.53 to 86.44) | 2.68%(0.81 to 4.69) |  | 7.22(1.08 to 14.34) | 1.58%(0.27 to 2.83) |
| Low temperature | 505.3(432.02 to 619.92) | 6.13%(5.91 to 6.97) |  | 91.34(74.99 to 109.64) | 7.36%(7.22 to 8.04) |  | 161.78(138.03 to 198.11) | 7.21%(6.98 to 8.07) |  | 150.11(127.84 to 178.55) | 5.81%(5.53 to 6.35) |  | 81.16(61.93 to 104.9) | 4.75%(4.02 to 5.69) |  | 20.46(16 to 25.36) | 4.49%(3.96 to 5.01) |
| Lead exposure | 590.37(-83.78 to 1233.63) | 7.16%(-1.15 to 13.86) |  | 49.29(-6.96 to 107.58) | 3.97%(-0.67 to 7.89) |  | 118.37(-16.28 to 251.98) | 5.28%(-0.82 to 10.26) |  | 204.07(-28.95 to 424.99) | 7.9%(-1.25 to 15.12) |  | 169.23(-24.37 to 361.48) | 9.9%(-1.58 to 19.61) |  | 48.88(-7.14 to 102.01) | 10.72%(-1.77 to 20.15) |
| **Behavioral risks** |  |  |  |  |  |  |  |  |  |  |  |  |  |  |  |  |  |
| Low physical activity | 232.25(103.52 to 371.37) | 2.82%(1.42 to 4.17) |  | 35.92(14.37 to 58.94) | 2.89%(1.38 to 4.32) |  | 66.68(28.94 to 111.39) | 2.97%(1.46 to 4.54) |  | 79.47(35.67 to 125.59) | 3.08%(1.54 to 4.47) |  | 43.06(19.11 to 68.47) | 2.52%(1.24 to 3.71) |  | 6.87(2.97 to 11.06) | 1.51%(0.74 to 2.19) |
| Secondhand smoke | 414.64(307.78 to 528.09) | 5.03%(4.21 to 5.93) |  | 37.16(26.6 to 49.16) | 2.99%(2.56 to 3.61) |  | 130.37(93.19 to 168.8) | 5.81%(4.71 to 6.87) |  | 148.71(108.1 to 194) | 5.75%(4.68 to 6.9) |  | 82.28(60.68 to 105.21) | 4.81%(3.94 to 5.71) |  | 15.74(11.32 to 20.94) | 3.45%(2.81 to 4.14) |
| Smoking | 1346.29(1143.83 to 1571.73) | 16.33%(15.65 to 17.66) |  | 183.8(150.04 to 217.95) | 14.81%(14.45 to 15.99) |  | 378.97(313.32 to 448.55) | 16.89%(15.85 to 18.26) |  | 435.7(361.54 to 512.59) | 16.86%(15.64 to 18.24) |  | 290.37(243.27 to 338.39) | 16.99%(15.8 to 18.36) |  | 56.16(46.13 to 67.49) | 12.32%(11.43 to 13.33) |
| **Dietary risks** |  |  |  |  |  |  |  |  |  |  |  |  |  |  |  |  |  |
| Diet low in fruits | 601.9(126.53 to 1003.68) | 7.3%(1.73 to 11.28) |  | 55.65(11.34 to 97.88) | 4.48%(1.09 to 7.18) |  | 108.99(22.49 to 190.61) | 4.86%(1.14 to 7.76) |  | 183.18(38.21 to 306) | 7.09%(1.65 to 10.89) |  | 197.79(41.52 to 321.82) | 11.57%(2.7 to 17.46) |  | 55.9(11.96 to 91.96) | 12.26%(2.96 to 18.17) |
| Diet low in vegetables | 239.77(112 to 379.25) | 2.91%(1.53 to 4.26) |  | 32.43(13.98 to 53.38) | 2.61%(1.35 to 3.92) |  | 34.41(14.73 to 58.05) | 1.53%(0.75 to 2.36) |  | 68.97(31.97 to 110.87) | 2.67%(1.38 to 3.95) |  | 72.42(35.03 to 109.75) | 4.24%(2.28 to 5.95) |  | 31.27(15.16 to 46.66) | 6.86%(3.76 to 9.22) |
| Diet low in whole grains | 1125.89(680.98 to 1546.74) | 13.66%(9.32 to 17.38) |  | 155.75(90.86 to 218.84) | 12.55%(8.75 to 16.06) |  | 338.44(201.84 to 474.83) | 15.09%(10.21 to 19.33) |  | 329.93(200.26 to 456.97) | 12.77%(8.66 to 16.26) |  | 229.41(139.5 to 311.22) | 13.42%(9.06 to 16.89) |  | 71.14(43.63 to 97.07) | 15.61%(10.81 to 19.18) |
| Diet high in red meat | 181.39(-8.72 to 370.17) | 2.2%(-0.12 to 4.16) |  | 48.81(-2.39 to 102.02) | 3.93%(-0.23 to 7.49) |  | 71.19(-3.48 to 146.37) | 3.17%(-0.18 to 5.96) |  | 54.57(-2.55 to 115.01) | 2.11%(-0.11 to 4.09) |  | 6.05(-0.27 to 12.67) | 0.35%(-0.02 to 0.69) |  | 0.56(-0.02 to 1.21) | 0.12%(0 to 0.24) |
| Diet high in processed meat | 77.84(31.4 to 121.59) | 0.94%(0.43 to 1.37) |  | 45.64(18.32 to 70.9) | 3.68%(1.76 to 5.2) |  | 24.97(9.43 to 39.04) | 1.11%(0.48 to 1.59) |  | 3.04(1.18 to 4.9) | 0.12%(0.05 to 0.17) |  | 3.07(1.13 to 4.95) | 0.18%(0.07 to 0.27) |  | 1.06(0.4 to 1.76) | 0.23%(0.1 to 0.35) |
| Diet high in sugar-sweetened beverages | 6.87(-1.64 to 14.79) | 0.08%(-0.02 to 0.17) |  | 1.95(-0.44 to 4.24) | 0.16%(-0.04 to 0.31) |  | 1.58(-0.38 to 3.42) | 0.07%(-0.02 to 0.14) |  | 2.05(-0.49 to 4.4) | 0.08%(-0.02 to 0.16) |  | 1.11(-0.27 to 2.43) | 0.07%(-0.02 to 0.13) |  | 0.17(-0.04 to 0.38) | 0.04%(-0.01 to 0.08) |
| Diet low in fiber | 458.82(240.4 to 666.58) | 5.57%(3.29 to 7.49) |  | 69.09(34.65 to 104.87) | 5.57%(3.34 to 7.69) |  | 89.77(43.8 to 134.06) | 4%(2.22 to 5.46) |  | 141.11(72.84 to 201.15) | 5.46%(3.15 to 7.16) |  | 128.03(67.56 to 182.8) | 7.49%(4.39 to 9.92) |  | 30.36(16.2 to 44.29) | 6.66%(4.01 to 8.75) |
| Diet low in polyunsaturated fatty acids | 737.12(-2119.61 to 2766.91) | 8.94%(-29 to 31.1) |  | 66.59(-171.24 to 257.49) | 5.37%(-16.49 to 18.89) |  | 196.95(-536.8 to 749.36) | 8.78%(-27.16 to 30.51) |  | 243.89(-705.49 to 910.11) | 9.44%(-30.51 to 32.39) |  | 178.39(-547.57 to 658.07) | 10.44%(-35.57 to 35.7) |  | 50.59(-157.56 to 184.77) | 11.1%(-39.04 to 36.5) |
| Diet high in sodium | 658.81(116.24 to 1564.79) | 7.99%(1.59 to 17.59) |  | 83.95(9.26 to 223.99) | 6.76%(0.89 to 16.44) |  | 209.16(45.97 to 464.88) | 9.32%(2.33 to 18.93) |  | 243.56(51.32 to 543.38) | 9.43%(2.22 to 19.34) |  | 99.97(9.06 to 276.25) | 5.85%(0.59 to 14.99) |  | 21.23(0.69 to 65.22) | 4.66%(0.17 to 12.89) |
| Diet low in legumes | 389.33(-313.42 to 1011.1) | 4.72%(-4.29 to 11.36) |  | 68.34(-55.43 to 183.7) | 5.51%(-5.34 to 13.48) |  | 111.45(-91.89 to 290.94) | 4.97%(-4.65 to 11.85) |  | 112.39(-88.3 to 286.13) | 4.35%(-3.82 to 10.18) |  | 74.09(-59.71 to 187.17) | 4.33%(-3.88 to 10.15) |  | 22.62(-18.52 to 57.44) | 4.96%(-4.59 to 11.35) |
| Diet low in nuts and seeds | 658.25(184.91 to 1086.13) | 7.99%(2.53 to 12.21) |  | 65.57(17.74 to 110.48) | 5.28%(1.71 to 8.11) |  | 174.86(48.28 to 298.31) | 7.79%(2.44 to 12.15) |  | 191.17(53.09 to 315.38) | 7.4%(2.3 to 11.22) |  | 180.95(52.35 to 290) | 10.59%(3.4 to 15.73) |  | 45.07(13.04 to 71.31) | 9.89%(3.23 to 14.09) |
| Diet low in seafood omega-3 fatty acids | 627.34(119.54 to 1082.74) | 7.61%(1.64 to 12.17) |  | 70.16(12.96 to 127.78) | 5.65%(1.25 to 9.38) |  | 118.54(22.45 to 213) | 5.28%(1.14 to 8.67) |  | 194.45(36.79 to 338.12) | 7.52%(1.59 to 12.03) |  | 178.27(34.9 to 297.39) | 10.43%(2.27 to 16.13) |  | 65.21(13.45 to 109.24) | 14.31%(3.33 to 21.58) |
| **Metabolic risks** |  |  |  |  |  |  |  |  |  |  |  |  |  |  |  |  |  |
| High fasting plasma glucose | 1345.84(1161.32 to 1549.27) | 16.33%(15.89 to 17.41) |  | 250.4(210.21 to 289.79) | 20.18%(20.25 to 21.26) |  | 333.66(281.19 to 386.44) | 14.87%(14.23 to 15.73) |  | 414.44(354.17 to 477.88) | 16.04%(15.32 to 17) |  | 280.75(241.09 to 322.86) | 16.43%(15.66 to 17.52) |  | 64.96(54.6 to 76.37) | 14.25%(13.53 to 15.09) |
| High LDL cholesterol | 2709.81(1803.8 to 3683.8) | 32.88%(24.68 to 41.4) |  | 409.28(269.22 to 567.36) | 32.98%(25.93 to 41.63) |  | 757.2(504 to 1028.02) | 33.75%(25.5 to 41.86) |  | 851.45(568.35 to 1154.79) | 32.95%(24.58 to 41.09) |  | 549.71(373.3 to 737.13) | 32.16%(24.25 to 39.99) |  | 139.14(94.59 to 189.87) | 30.53%(23.44 to 37.51) |
| High systolic blood pressure | 4692.86(3799.89 to 5515.76) | 56.94%(51.99 to 61.99) |  | 696.92(538.08 to 838.24) | 56.15%(51.83 to 61.5) |  | 1356.64(1101.52 to 1600.03) | 60.48%(55.73 to 65.15) |  | 1455.32(1169.45 to 1723.45) | 56.32%(50.58 to 61.33) |  | 942.43(761.33 to 1111.84) | 55.14%(49.45 to 60.32) |  | 236.39(183.76 to 285.82) | 51.86%(45.54 to 56.47) |
| High body-mass index | 985.92(378.3 to 1610.22) | 11.96%(5.18 to 18.1) |  | 192.54(76.13 to 318.34) | 15.51%(7.33 to 23.36) |  | 306.64(118 to 511.49) | 13.67%(5.97 to 20.83) |  | 277.54(108.45 to 453.73) | 10.74%(4.69 to 16.15) |  | 173.42(67.96 to 277.13) | 10.15%(4.41 to 15.04) |  | 34.49(12.7 to 56.37) | 7.57%(3.15 to 11.14) |
| Kidney dysfunction | 1398.57(976.44 to 1778.4) | 16.97%(13.36 to 19.99) |  | 247.96(174.44 to 319.42) | 19.98%(16.8 to 23.44) |  | 369.62(252.99 to 480.88) | 16.48%(12.8 to 19.58) |  | 427.8(297.23 to 550.31) | 16.55%(12.86 to 19.58) |  | 281.11(201.82 to 360.78) | 16.45%(13.11 to 19.57) |  | 70.68(49.14 to 91.61) | 15.51%(12.18 to 18.1) |

**Table S3** IHD-related DALYs (absolute numbers and percentages) associated with risk factors and their clusters in 2021

|  | Global | |  | High SDI | |  | High-middle SDI | |  | Middle SDI | |  | Low-middle SDI | |  | Low SDI | |
| --- | --- | --- | --- | --- | --- | --- | --- | --- | --- | --- | --- | --- | --- | --- | --- | --- | --- |
|  | Absolute number(millions) | Percentage |  | Absolute number(millions) | Percentage |  | Absolute number(millions) | Percentage |  | Absolute number(millions) | Percentage |  | Absolute number(millions) | Percentage |  | Absolute number(millions) | Percentage |
| **Environmental risks** |  |  |  |  |  |  |  |  |  |  |  |  |  |  |  |  |  |
| Ambient particulate matter pollution | 36.52(25.54 to 48.13) | 21.01%(16.23 to 25.85) |  | 2.78(1.91 to 3.7) | 13.06%(10.18 to 16.09) |  | 9.04(6.36 to 11.81) | 21.93%(17.28 to 26.22) |  | 15.16(9.94 to 19.95) | 26.81%(19.59 to 32.55) |  | 8.27(5.06 to 11.59) | 19.31%(13.11 to 24.92) |  | 1.23(0.77 to 1.82) | 10.51%(7.47 to 13.83) |
| Household air pollution from solid fuels | 18.15(10.27 to 31.39) | 10.44%(6.53 to 16.86) |  | 0.01(0 to 0.13) | 0.06%(0 to 0.56) |  | 0.68(0.05 to 3.32) | 1.64%(0.13 to 7.36) |  | 3.83(0.92 to 9.68) | 6.77%(1.81 to 15.8) |  | 9.27(5.53 to 13.6) | 21.63%(14.33 to 29.26) |  | 4.35(3.34 to 5.41) | 37.08%(32.28 to 41.2) |
| High temperature | 2.62(0.47 to 5.73) | 1.51%(0.3 to 3.08) |  | 0.21(0.01 to 0.57) | 0.97%(0.05 to 2.48) |  | 0.24(-0.06 to 0.83) | 0.59%(-0.16 to 1.84) |  | 0.82(0.16 to 1.79) | 1.45%(0.31 to 2.91) |  | 1.17(0.31 to 2.21) | 2.73%(0.82 to 4.76) |  | 0.18(0.03 to 0.37) | 1.55%(0.25 to 2.8) |
| Low temperature | 9.96(8.58 to 12.29) | 5.73%(5.45 to 6.6) |  | 1.49(1.29 to 1.8) | 7.01%(6.85 to 7.81) |  | 2.83(2.47 to 3.45) | 6.88%(6.71 to 7.67) |  | 3.06(2.62 to 3.65) | 5.41%(5.16 to 5.96) |  | 2.04(1.54 to 2.66) | 4.76%(3.98 to 5.72) |  | 0.53(0.41 to 0.65) | 4.48%(3.98 to 4.97) |
| Lead exposure | 11.85(-1.67 to 24.79) | 6.82%(-1.06 to 13.32) |  | 0.79(-0.11 to 1.69) | 3.7%(-0.59 to 7.34) |  | 2.03(-0.28 to 4.33) | 4.92%(-0.75 to 9.61) |  | 4.01(-0.56 to 8.4) | 7.1%(-1.11 to 13.7) |  | 3.87(-0.55 to 8.3) | 9.04%(-1.43 to 17.84) |  | 1.14(-0.17 to 2.42) | 9.75%(-1.6 to 18.41) |
| **Behavioral risks** |  |  |  |  |  |  |  |  |  |  |  |  |  |  |  |  |  |
| Low physical activity | 3.9(1.77 to 6.12) | 2.24%(1.12 to 3.29) |  | 0.5(0.21 to 0.81) | 2.36%(1.13 to 3.5) |  | 0.96(0.42 to 1.55) | 2.33%(1.13 to 3.43) |  | 1.42(0.65 to 2.23) | 2.51%(1.27 to 3.64) |  | 0.87(0.4 to 1.34) | 2.03%(1.04 to 2.89) |  | 0.14(0.06 to 0.22) | 1.22%(0.62 to 1.7) |
| Secondhand smoke | 9.7(7.26 to 12.13) | 5.58%(4.62 to 6.52) |  | 0.83(0.61 to 1.07) | 3.89%(3.26 to 4.66) |  | 2.65(1.96 to 3.35) | 6.42%(5.31 to 7.43) |  | 3.44(2.56 to 4.38) | 6.09%(5.05 to 7.14) |  | 2.32(1.69 to 2.94) | 5.41%(4.38 to 6.31) |  | 0.46(0.34 to 0.61) | 3.95%(3.24 to 4.63) |
| Smoking | 35.48(30.53 to 40.7) | 20.42%(19.4 to 21.86) |  | 4.32(3.64 to 5.02) | 20.28%(19.34 to 21.82) |  | 9.39(8.01 to 10.82) | 22.79%(21.76 to 24.02) |  | 11.55(9.73 to 13.38) | 20.42%(19.16 to 21.84) |  | 8.49(7.19 to 9.8) | 19.82%(18.65 to 21.09) |  | 1.7(1.4 to 2.01) | 14.5%(13.53 to 15.34) |
| **Dietary risks** |  |  |  |  |  |  |  |  |  |  |  |  |  |  |  |  |  |
| Diet low in fruits | 15.93(3.49 to 25.8) | 9.16%(2.22 to 13.86) |  | 1.11(0.23 to 1.9) | 5.22%(1.25 to 8.28) |  | 2.32(0.51 to 3.93) | 5.62%(1.4 to 8.73) |  | 4.97(1.11 to 8.1) | 8.78%(2.18 to 13.22) |  | 5.85(1.27 to 9.45) | 13.65%(3.28 to 20.33) |  | 1.68(0.37 to 2.72) | 14.3%(3.55 to 20.75) |
| Diet low in vegetables | 6.12(3.03 to 9.49) | 3.52%(1.92 to 5.1) |  | 0.61(0.28 to 0.97) | 2.89%(1.49 to 4.23) |  | 0.7(0.32 to 1.15) | 1.7%(0.86 to 2.56) |  | 1.82(0.9 to 2.85) | 3.22%(1.76 to 4.65) |  | 2.05(1.04 to 3.1) | 4.79%(2.69 to 6.67) |  | 0.92(0.46 to 1.36) | 7.86%(4.46 to 10.37) |
| Diet low in whole grains | 27.13(16.85 to 36.7) | 15.61%(10.71 to 19.71) |  | 3.09(1.9 to 4.24) | 14.52%(10.11 to 18.45) |  | 7.05(4.28 to 9.58) | 17.11%(11.63 to 21.27) |  | 8.25(5.05 to 11.27) | 14.59%(9.95 to 18.39) |  | 6.59(4.07 to 8.91) | 15.38%(10.55 to 19.17) |  | 2.12(1.32 to 2.86) | 18.07%(12.71 to 21.81) |
| Diet high in red meat | 4.41(-0.22 to 8.96) | 2.54%(-0.14 to 4.81) |  | 1.04(-0.05 to 2.12) | 4.9%(-0.29 to 9.23) |  | 1.67(-0.09 to 3.4) | 4.05%(-0.23 to 7.55) |  | 1.47(-0.07 to 3.06) | 2.6%(-0.15 to 5) |  | 0.2(-0.01 to 0.42) | 0.47%(-0.02 to 0.91) |  | 0.02(0 to 0.05) | 0.2%(-0.01 to 0.4) |
| Diet high in processed meat | 1.9(0.76 to 2.95) | 1.09%(0.49 to 1.59) |  | 1.09(0.44 to 1.7) | 5.13%(2.35 to 7.4) |  | 0.57(0.23 to 0.9) | 1.39%(0.61 to 2) |  | 0.09(0.03 to 0.15) | 0.16%(0.07 to 0.24) |  | 0.11(0.04 to 0.17) | 0.25%(0.1 to 0.37) |  | 0.04(0.01 to 0.06) | 0.31%(0.14 to 0.46) |
| Diet high in sugar-sweetened beverages | 0.2(-0.05 to 0.44) | 0.12%(-0.03 to 0.23) |  | 0.05(-0.01 to 0.11) | 0.25%(-0.06 to 0.5) |  | 0.04(-0.01 to 0.09) | 0.1%(-0.03 to 0.19) |  | 0.06(-0.02 to 0.14) | 0.11%(-0.03 to 0.23) |  | 0.04(-0.01 to 0.08) | 0.09%(-0.02 to 0.17) |  | 0.01(0 to 0.01) | 0.05%(-0.01 to 0.1) |
| Diet low in fiber | 11.54(6.16 to 16.41) | 6.64%(3.91 to 8.81) |  | 1.25(0.66 to 1.87) | 5.86%(3.51 to 8.14) |  | 1.89(0.96 to 2.81) | 4.58%(2.61 to 6.23) |  | 3.76(1.98 to 5.3) | 6.65%(3.9 to 8.65) |  | 3.72(1.99 to 5.29) | 8.69%(5.17 to 11.39) |  | 0.92(0.49 to 1.32) | 7.81%(4.76 to 10.05) |
| Diet low in polyunsaturated fatty acids | 17.85(-56.02 to 65.94) | 10.27%(-35.6 to 35.42) |  | 1.24(-3.42 to 4.67) | 5.84%(-18.17 to 20.33) |  | 4.04(-11.96 to 15.18) | 9.79%(-32.49 to 33.7) |  | 6.05(-19.24 to 22.33) | 10.71%(-37.9 to 36.44) |  | 5.04(-16.78 to 18.54) | 11.77%(-43.5 to 39.87) |  | 1.46(-4.83 to 5.31) | 12.43%(-46.63 to 40.42) |
| Diet high in sodium | 14.08(2.84 to 32.53) | 8.1%(1.81 to 17.47) |  | 1.47(0.18 to 3.87) | 6.89%(0.97 to 16.81) |  | 4.19(1.1 to 8.87) | 10.17%(3 to 19.68) |  | 5.4(1.31 to 11.84) | 9.54%(2.57 to 19.32) |  | 2.49(0.26 to 6.63) | 5.81%(0.66 to 14.25) |  | 0.52(0.02 to 1.56) | 4.41%(0.18 to 11.85) |
| Diet low in legumes | 9.16(-7.64 to 22.95) | 5.27%(-4.85 to 12.33) |  | 1.28(-1.05 to 3.31) | 6%(-5.58 to 14.4) |  | 2.27(-1.97 to 5.77) | 5.5%(-5.34 to 12.8) |  | 2.85(-2.32 to 7.06) | 5.04%(-4.57 to 11.53) |  | 2.09(-1.74 to 5.22) | 4.88%(-4.51 to 11.22) |  | 0.67(-0.56 to 1.66) | 5.69%(-5.43 to 12.63) |
| Diet low in nuts and seeds | 16.26(4.81 to 26.19) | 9.36%(3.06 to 14.07) |  | 1.18(0.33 to 1.93) | 5.54%(1.78 to 8.41) |  | 3.54(1.03 to 5.91) | 8.59%(2.79 to 13.12) |  | 4.88(1.42 to 7.92) | 8.63%(2.8 to 12.92) |  | 5.28(1.59 to 8.3) | 12.32%(4.14 to 17.84) |  | 1.37(0.41 to 2.13) | 11.64%(3.97 to 16.19) |
| Diet low in seafood omega-3 fatty acids | 15.51(3.1 to 25.95) | 8.92%(1.97 to 13.94) |  | 1.36(0.26 to 2.39) | 6.38%(1.4 to 10.38) |  | 2.3(0.46 to 4) | 5.59%(1.25 to 8.88) |  | 4.82(0.96 to 8.04) | 8.53%(1.9 to 13.12) |  | 5.1(1.03 to 8.33) | 11.9%(2.67 to 17.91) |  | 1.91(0.41 to 3.12) | 16.28%(3.96 to 23.73) |
| **Metabolic risks** |  |  |  |  |  |  |  |  |  |  |  |  |  |  |  |  |  |
| High fasting plasma glucose | 25.92(22.26 to 29.82) | 14.91%(14.15 to 16.02) |  | 4.12(3.58 to 4.7) | 19.36%(19.05 to 20.45) |  | 5.75(4.87 to 6.68) | 13.96%(13.24 to 14.84) |  | 8.31(7.1 to 9.54) | 14.69%(13.98 to 15.56) |  | 6.24(5.35 to 7.2) | 14.57%(13.86 to 15.48) |  | 1.46(1.21 to 1.72) | 12.46%(11.74 to 13.13) |
| High LDL cholesterol | 66.75(47.51 to 86.99) | 38.4%(30.19 to 46.72) |  | 8.14(5.59 to 10.77) | 38.24%(29.72 to 46.82) |  | 16.11(11.35 to 21.09) | 39.1%(30.84 to 46.81) |  | 22.05(15.42 to 28.69) | 38.98%(30.38 to 46.82) |  | 16.16(11.41 to 21.27) | 37.71%(29.58 to 45.74) |  | 4.22(2.94 to 5.6) | 35.98%(28.45 to 42.67) |
| High systolic blood pressure | 93.96(75.57 to 110.79) | 54.06%(48.03 to 59.51) |  | 11.34(8.94 to 13.53) | 53.3%(47.52 to 58.82) |  | 24.16(19.69 to 28.54) | 58.61%(53.5 to 63.35) |  | 30.26(24.16 to 36.09) | 53.52%(47.58 to 58.89) |  | 22.33(17.78 to 26.54) | 52.1%(46.1 to 57.07) |  | 5.77(4.49 to 7) | 49.22%(43.4 to 53.35) |
| High body-mass index | 23.91(9.47 to 38.33) | 13.76%(6.02 to 20.59) |  | 3.99(1.63 to 6.34) | 18.75%(8.67 to 27.59) |  | 6.54(2.6 to 10.88) | 15.86%(7.07 to 24.14) |  | 7.26(2.92 to 11.76) | 12.84%(5.74 to 19.19) |  | 5.04(2.02 to 7.91) | 11.75%(5.23 to 17.01) |  | 1.06(0.4 to 1.73) | 9.06%(3.87 to 13.16) |
| Kidney dysfunction | 26.13(18.9 to 33.38) | 15.04%(12.01 to 17.93) |  | 3.56(2.55 to 4.53) | 16.71%(13.54 to 19.72) |  | 6(4.22 to 7.81) | 14.56%(11.46 to 17.34) |  | 8.5(6.11 to 11.01) | 15.04%(12.04 to 17.96) |  | 6.39(4.61 to 8.2) | 14.91%(11.94 to 17.64) |  | 1.66(1.15 to 2.14) | 14.12%(11.1 to 16.27) |

*Data in parentheses are 95% uncertainty intervals and confidence intervals. IHD: ischemic heart disease; SDI: sociodemographic index.*

**Figure S1** Leading Level 4 risks by attributable deaths and DALYs in High SDI region, 1990–2021. (**A)** deaths. (**B)** DALYs. **Abbreviations:** DALYs, disability-adjusted life years.


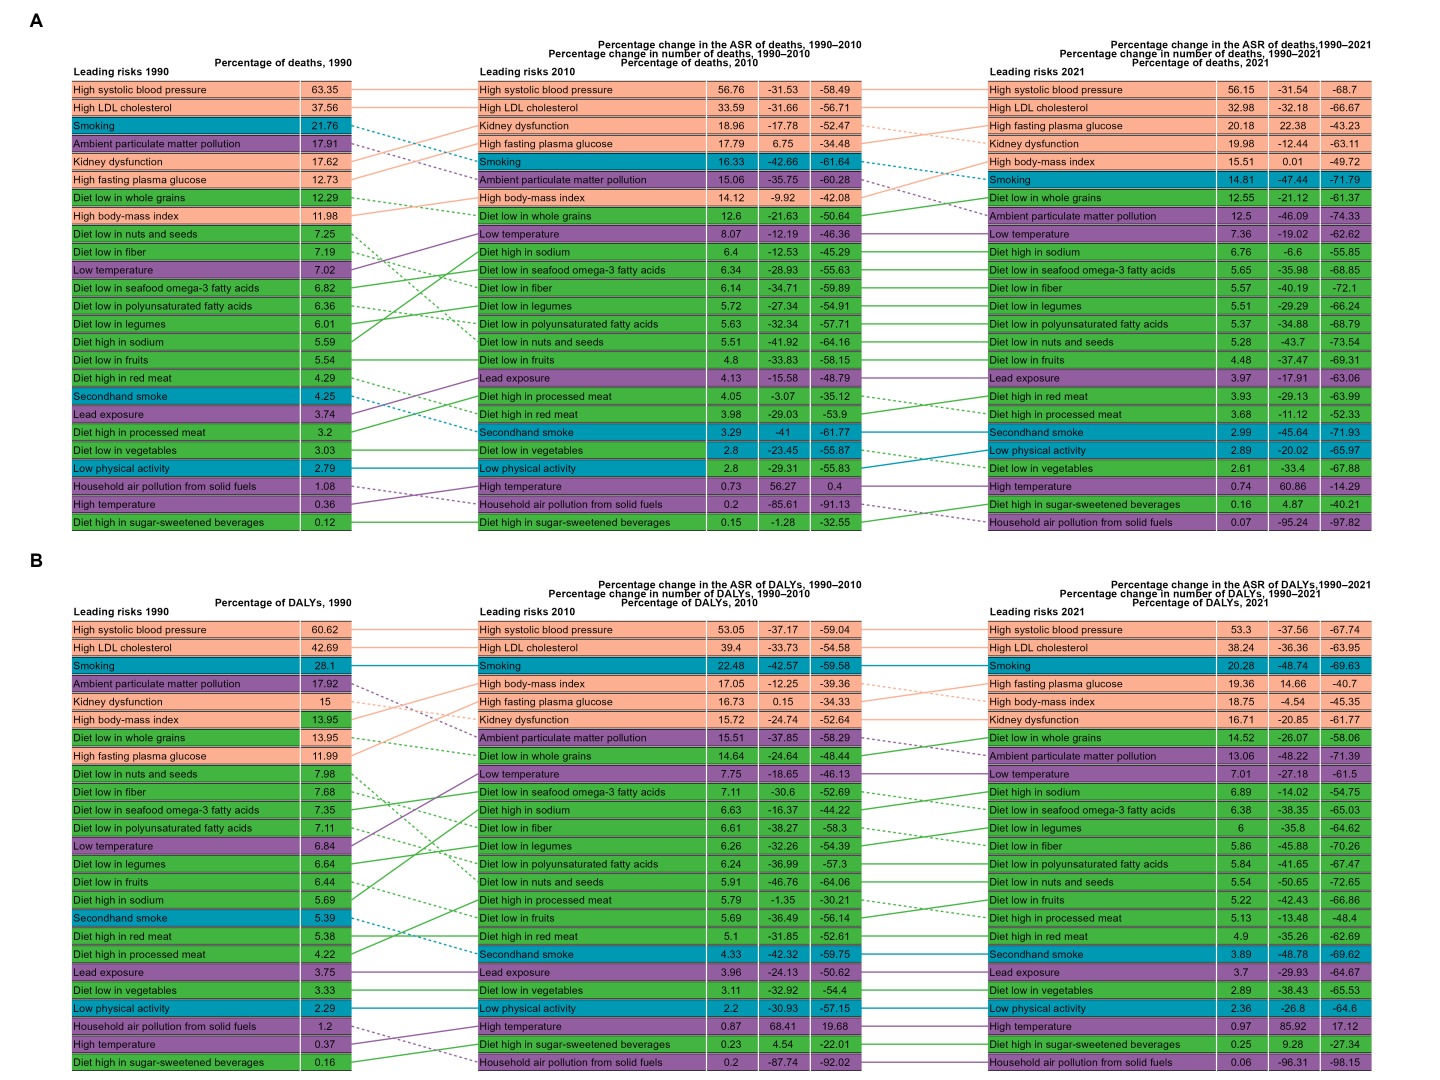


**Figure S2** Leading Level 4 risks by attributable deaths and DALYs in High-middle SDI region, 1990–2021. (**A)** deaths. (**B)** DALYs. **Abbreviations:** DALYs, disability-adjusted life years.


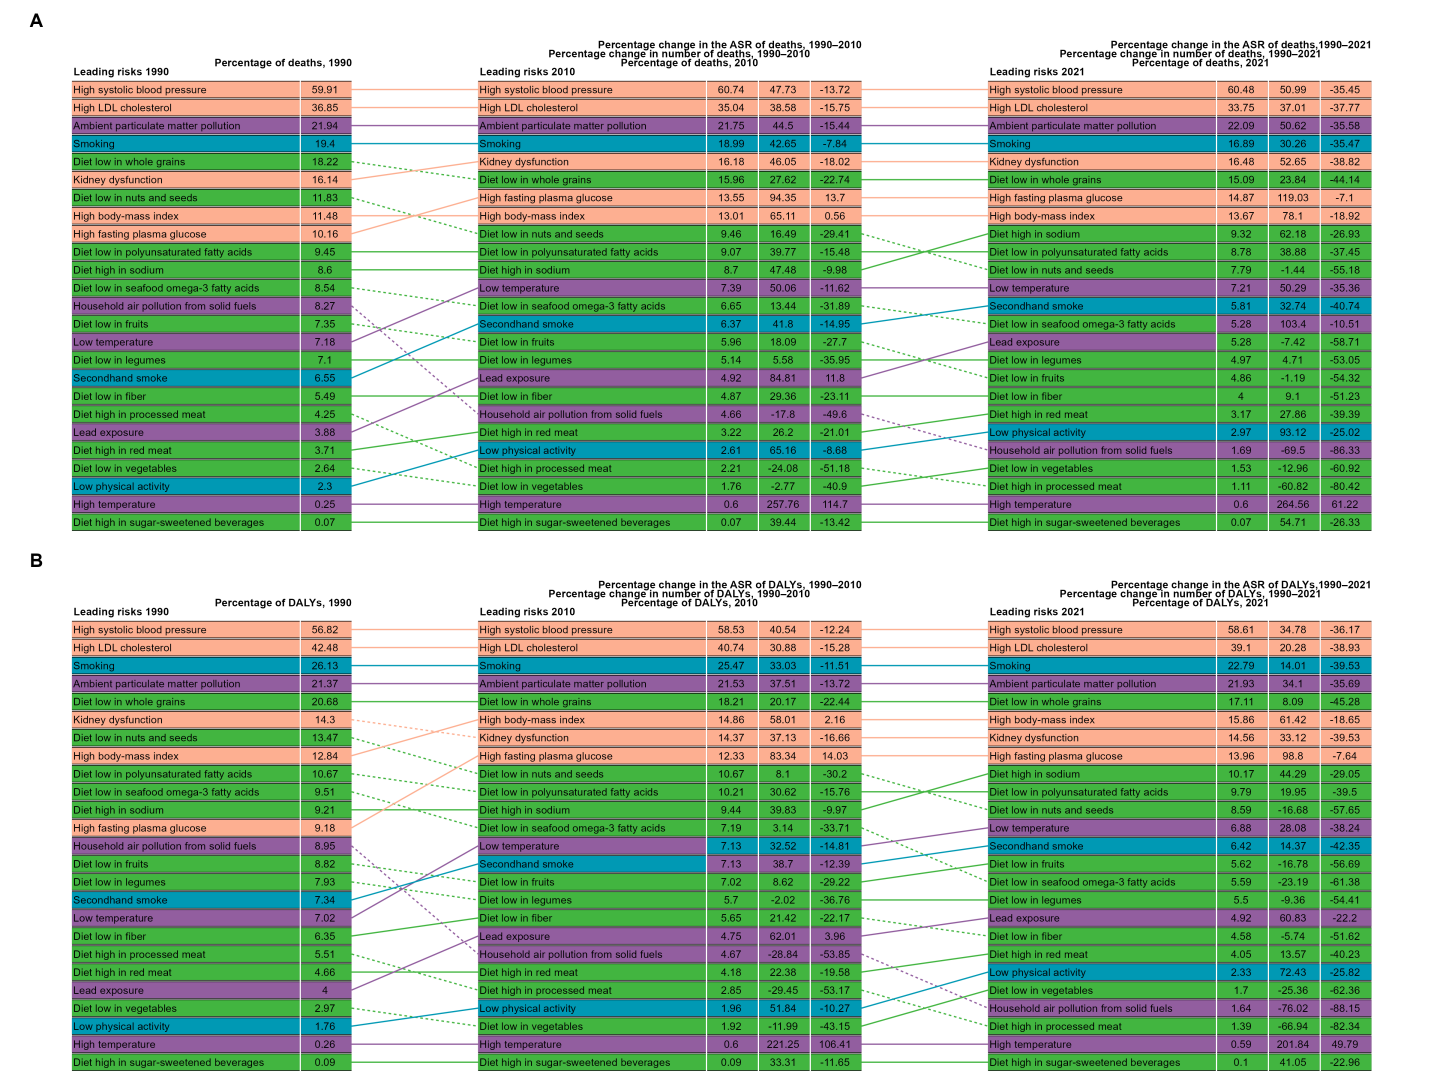


**Figure S3** Leading Level 4 risks by attributable deaths and DALYs in Middle SDI region, 1990–2021. (**A)** deaths. (**B)** DALYs. **Abbreviations:** DALYs, disability-adjusted life years.


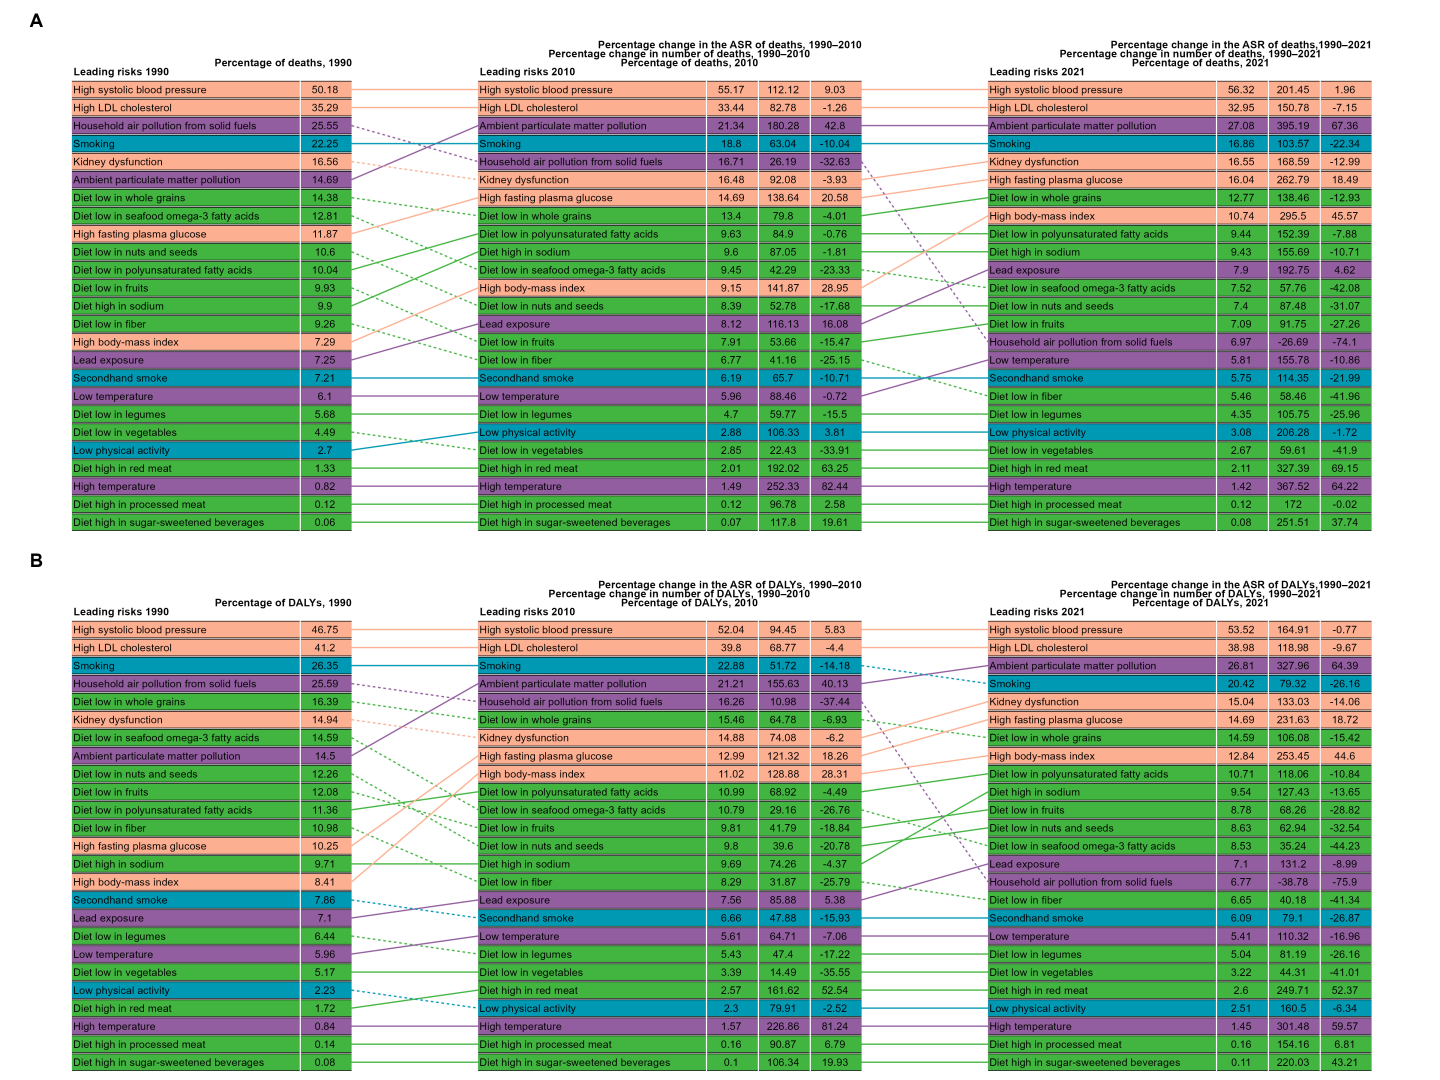


**Figure S4** Leading Level 4 risks by attributable deaths and DALYs in Low-middle SDI region, 1990–2021. (**A)** deaths. (**B)** DALYs. **Abbreviations:** DALYs, disability-adjusted life years.


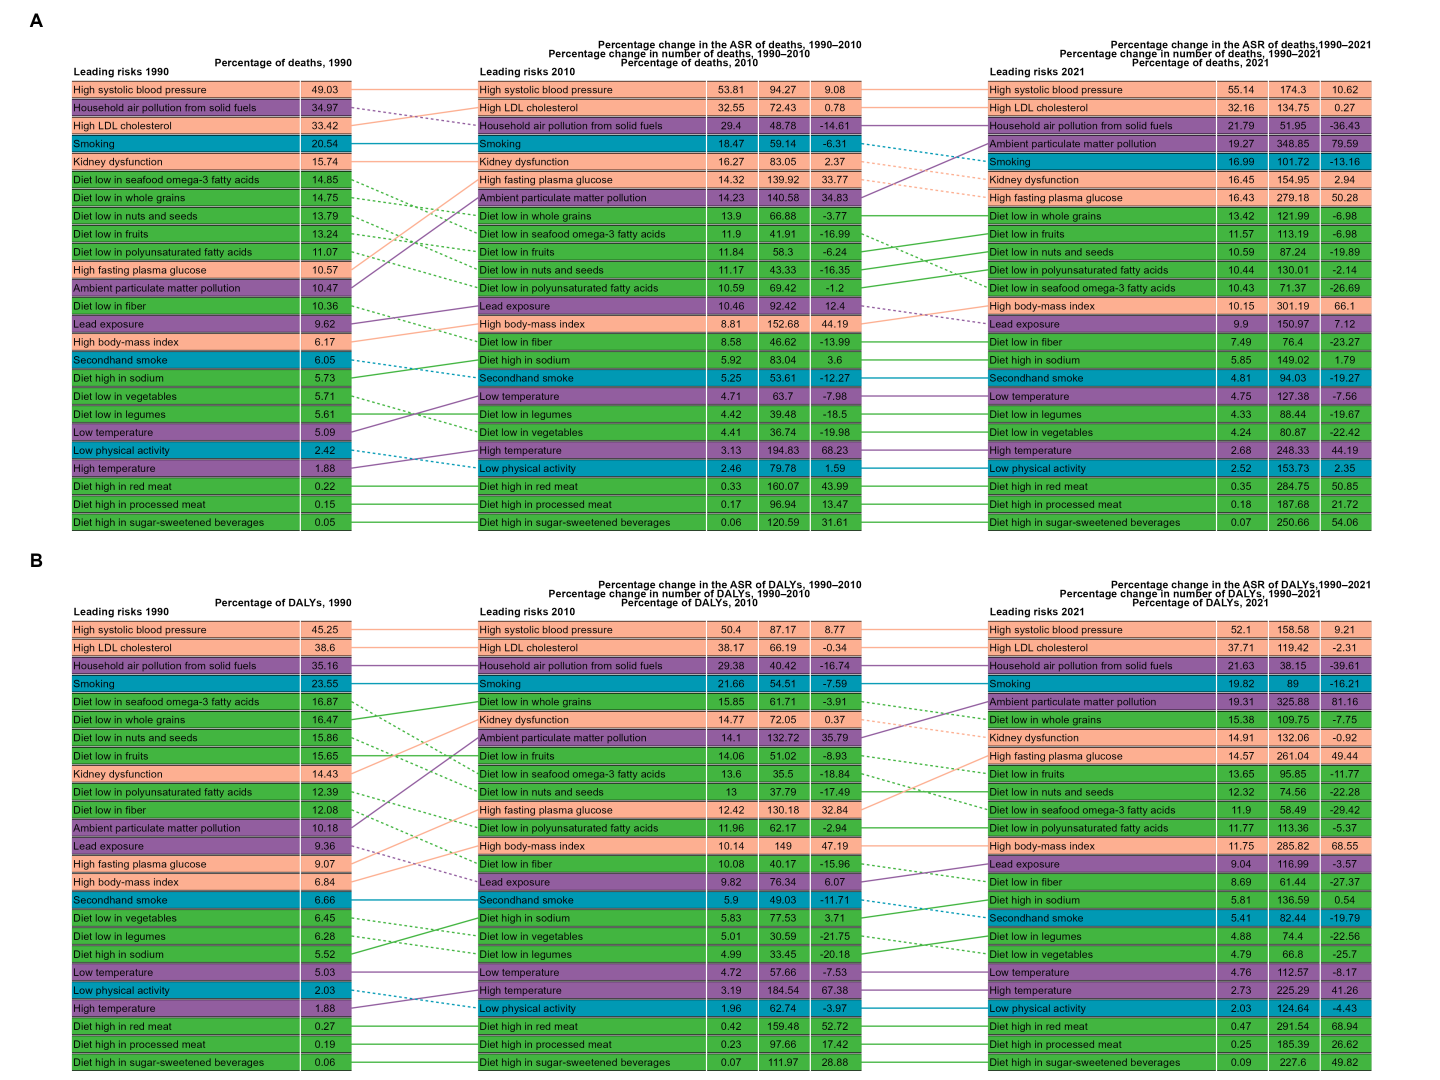


**Figure S5** Leading Level 4 risks by attributable deaths and DALYs in Low SDI region, 1990–2021. (**A)** deaths. (**B)** DALYs. **Abbreviations:** DALYs, disability-adjusted life years.


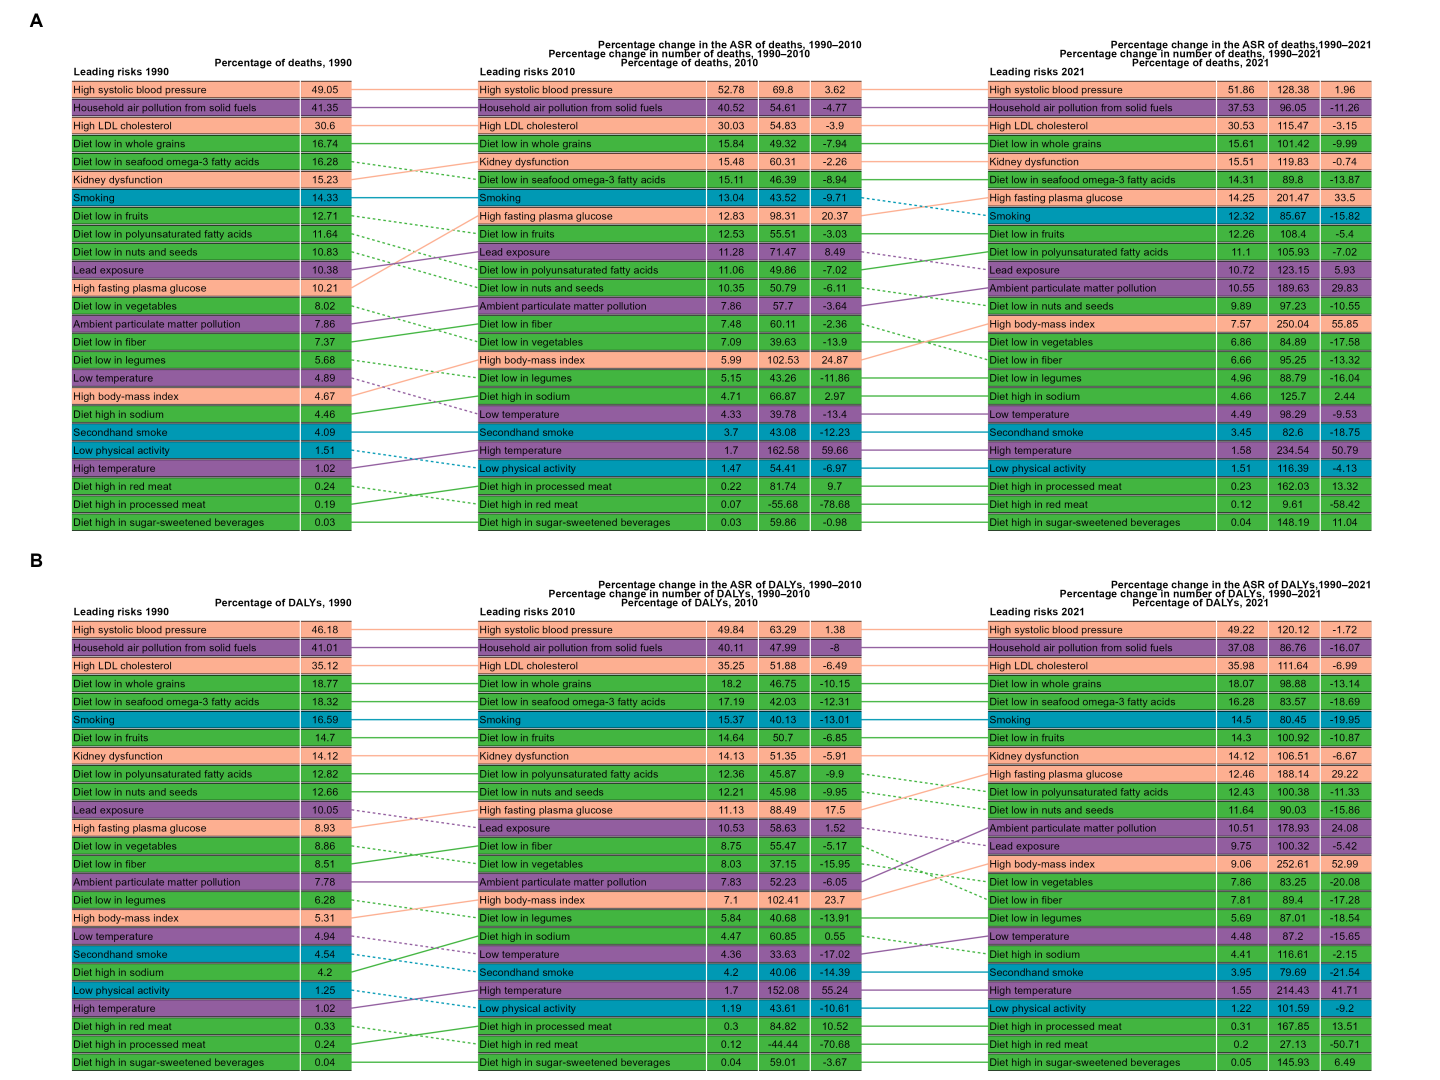


**Figure S6** Summary of analysis results for household air pollution from solid fuels. (**A)** The joinpoint regression analysis on SEV. (**B)** The joinpoint regression analysis on the ASR of deaths. (**C)** The joinpoint regression analysis on the ASR of DALYs. (**D)** Changes in deaths according to aging, population growth and epidemiological change from 1990 to 2021. (**E)** Changes in DALYs according to aging, population growth and epidemiological change from 1990 to 2021. (**F)** The correspondence between different regions and fixed effects quintiles of stroke related deaths. (**G)** The correspondence between different regions and fixed effects quintiles of stroke related DALYs. (**H)** The fixed-effects of deaths of 204 countries and territories. (**I)** The fixed-effects of DALYs of 204 countries and territories. **Abbreviations:** SEV, summary exposure value; ASR, age-standardized rate; DALYs, disability-adjusted life years.


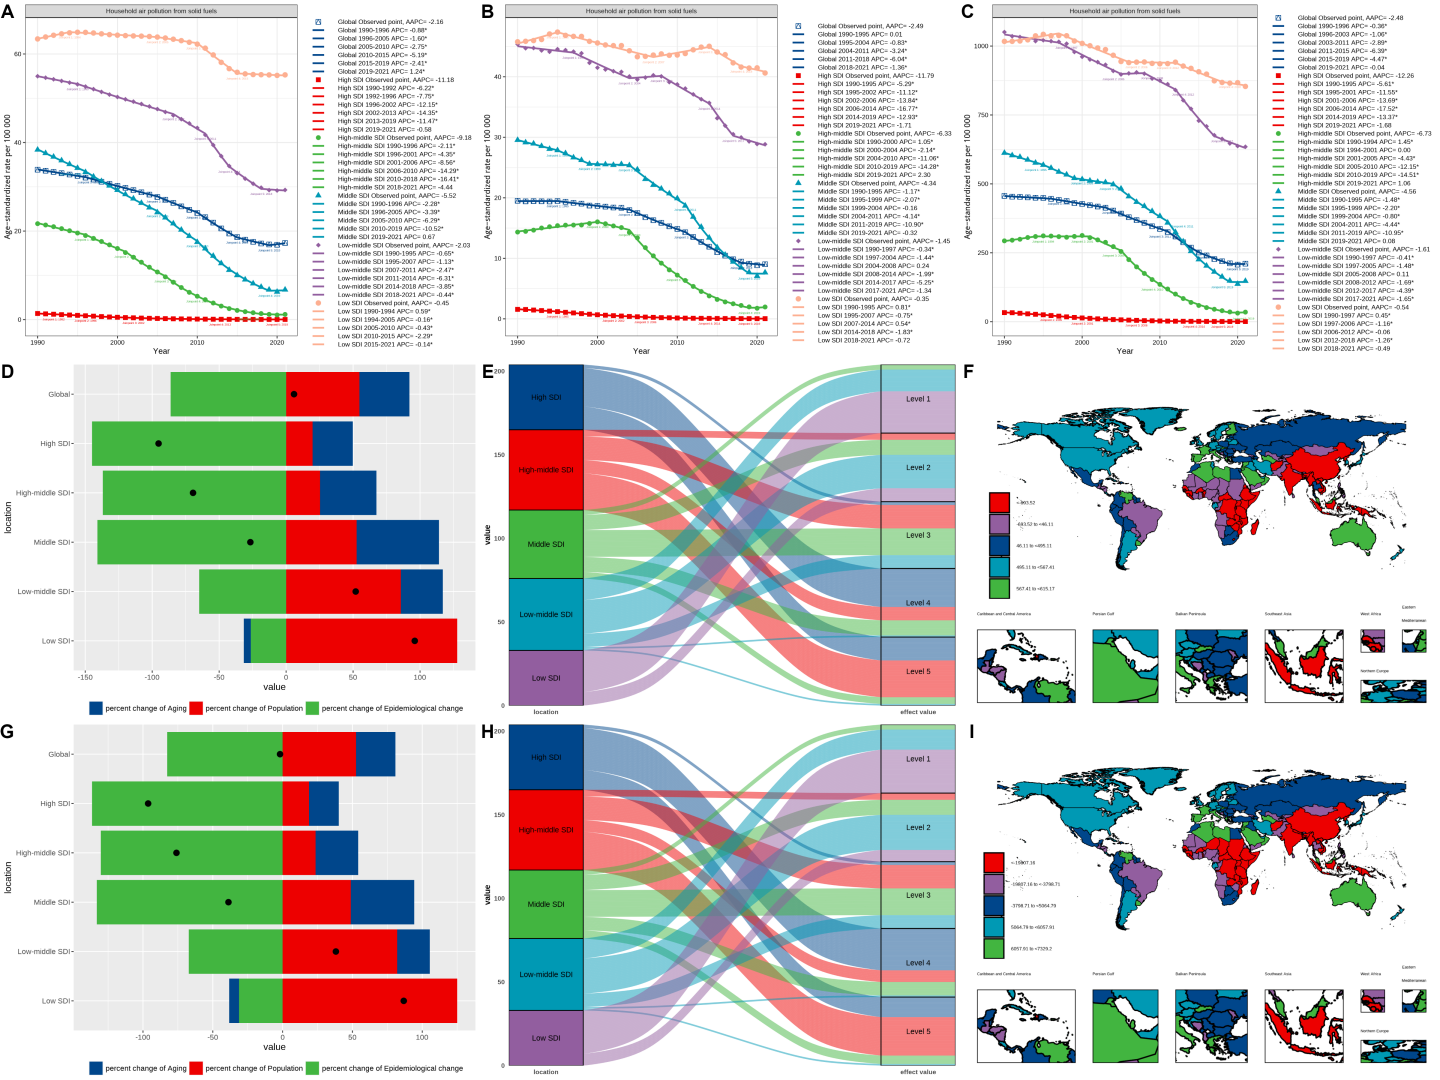


**Figure S7** Summary of analysis results for high temperature. (**A)** The joinpoint regression analysis on SEV. (**B)** The joinpoint regression analysis on the ASR of deaths. (**C)** The joinpoint regression analysis on the ASR of DALYs. (**D)** Changes in deaths according to aging, population growth and epidemiological change from 1990 to 2021. (**E)** Changes in DALYs according to aging, population growth and epidemiological change from 1990 to 2021. (**F)** The correspondence between different regions and fixed effects quintiles of stroke related deaths. (**G)** The correspondence between different regions and fixed effects quintiles of stroke related DALYs. (**H)** The fixed-effects of deaths of 204 countries and territories. (**I)** The fixed-effects of DALYs of 204 countries and territories. **Abbreviations:** SEV, summary exposure value; ASR, age-standardized rate; DALYs, disability-adjusted life years.


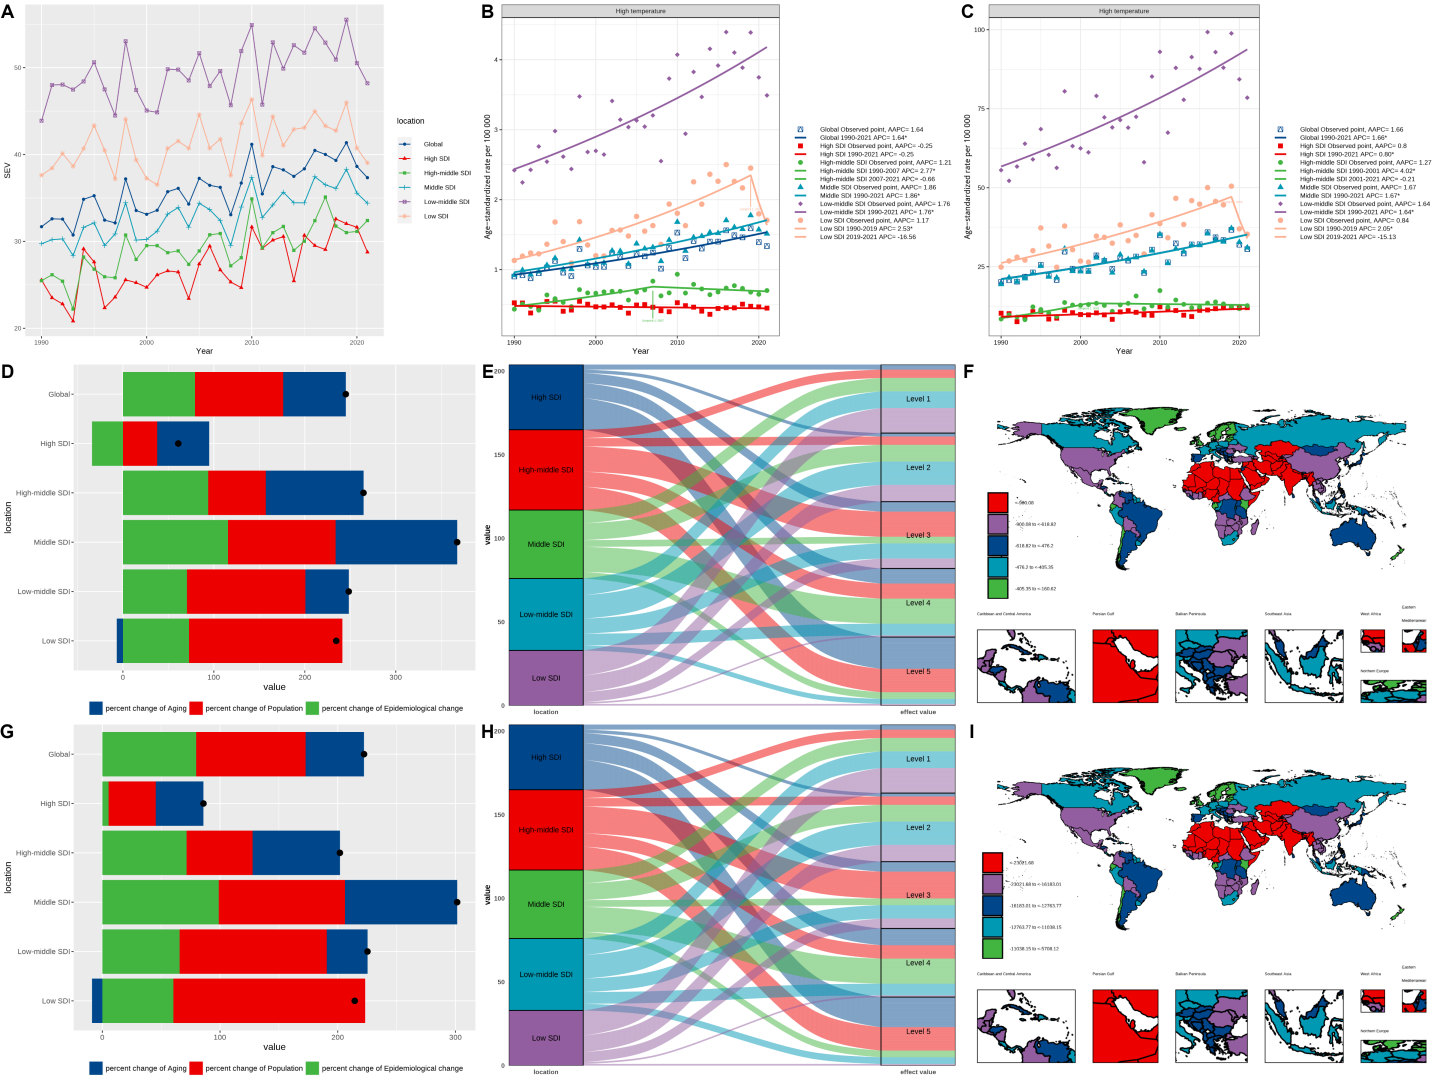


**Figure S8** Summary of analysis results for low temperature. (**A)** The joinpoint regression analysis on SEV. (**B)** The joinpoint regression analysis on the ASR of deaths. (**C)** The joinpoint regression analysis on the ASR of DALYs. (**D)** Changes in deaths according to aging, population growth and epidemiological change from 1990 to 2021. (**E)** Changes in DALYs according to aging, population growth and epidemiological change from 1990 to 2021. (**F)** The correspondence between different regions and fixed effects quintiles of stroke related deaths. (**G)** The correspondence between different regions and fixed effects quintiles of stroke related DALYs. (**H)** The fixed-effects of deaths of 204 countries and territories. (**I)** The fixed-effects of DALYs of 204 countries and territories. **Abbreviations:** SEV, summary exposure value; ASR, age-standardized rate; DALYs, disability-adjusted life years.


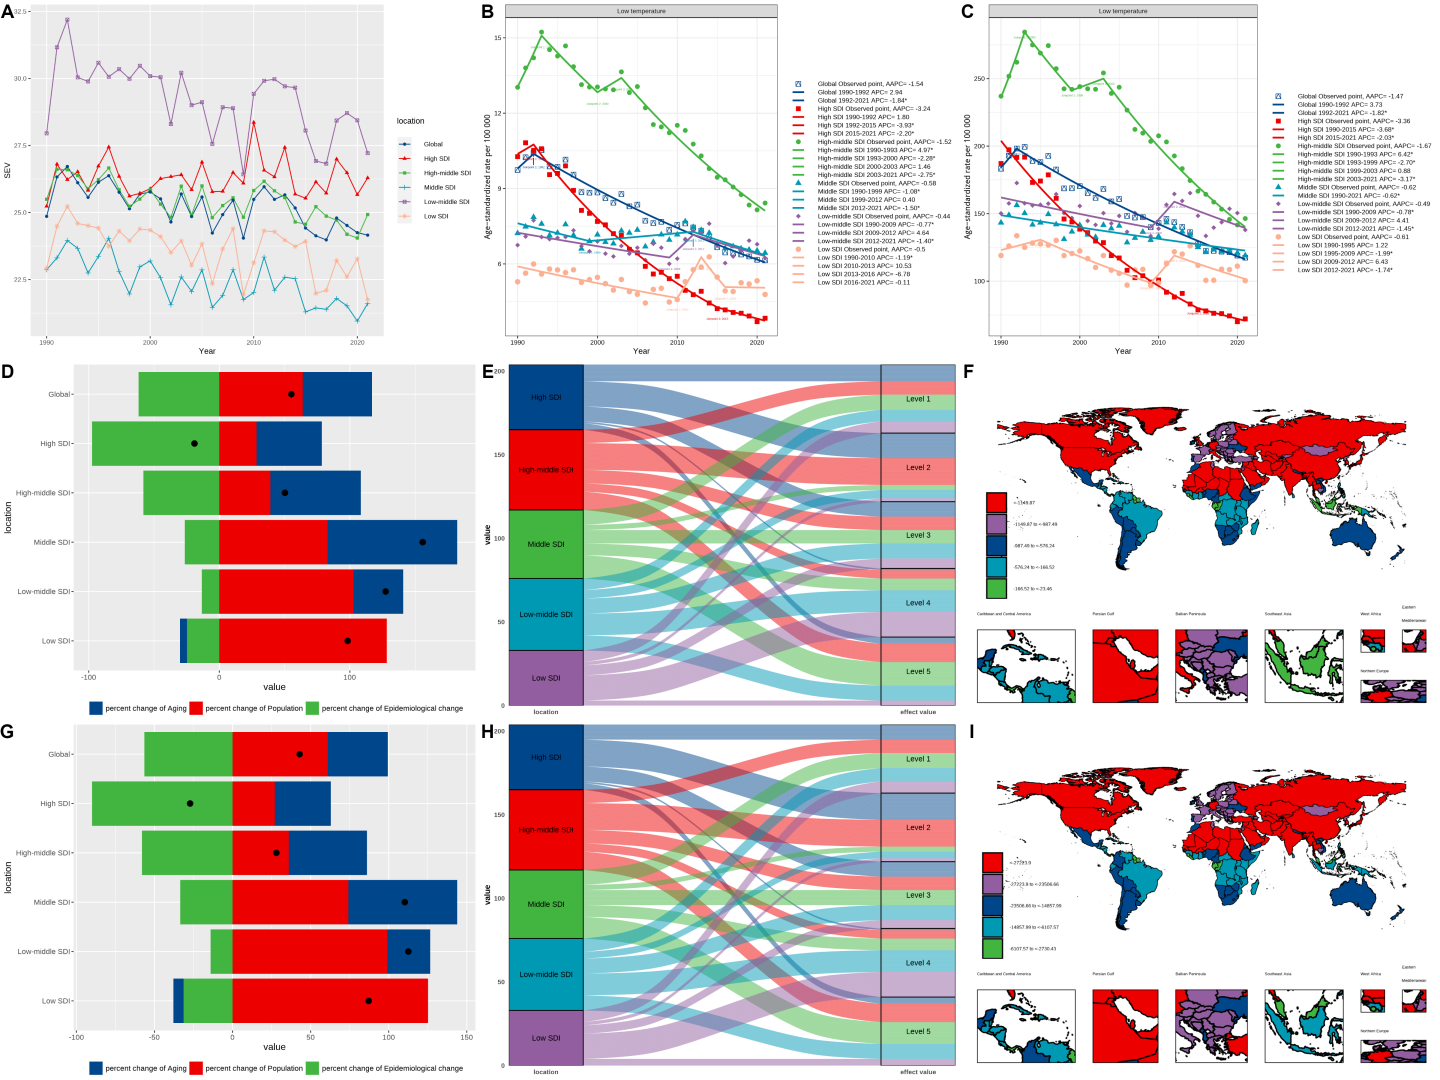


**Figure S9** Summary of analysis results for lead exposure. (**A)** The joinpoint regression analysis on SEV. (**B)** The joinpoint regression analysis on the ASR of deaths. (**C)** The joinpoint regression analysis on the ASR of DALYs. (**D)** Changes in deaths according to aging, population growth and epidemiological change from 1990 to 2021. (**E)** Changes in DALYs according to aging, population growth and epidemiological change from 1990 to 2021. (**F)** The correspondence between different regions and fixed effects quintiles of stroke related deaths. (**G)** The correspondence between different regions and fixed effects quintiles of stroke related DALYs. (**H)** The fixed-effects of deaths of 204 countries and territories. (**I)** The fixed-effects of DALYs of 204 countries and territories. **Abbreviations:** SEV, summary exposure value; ASR, age-standardized rate; DALYs, disability-adjusted life years.


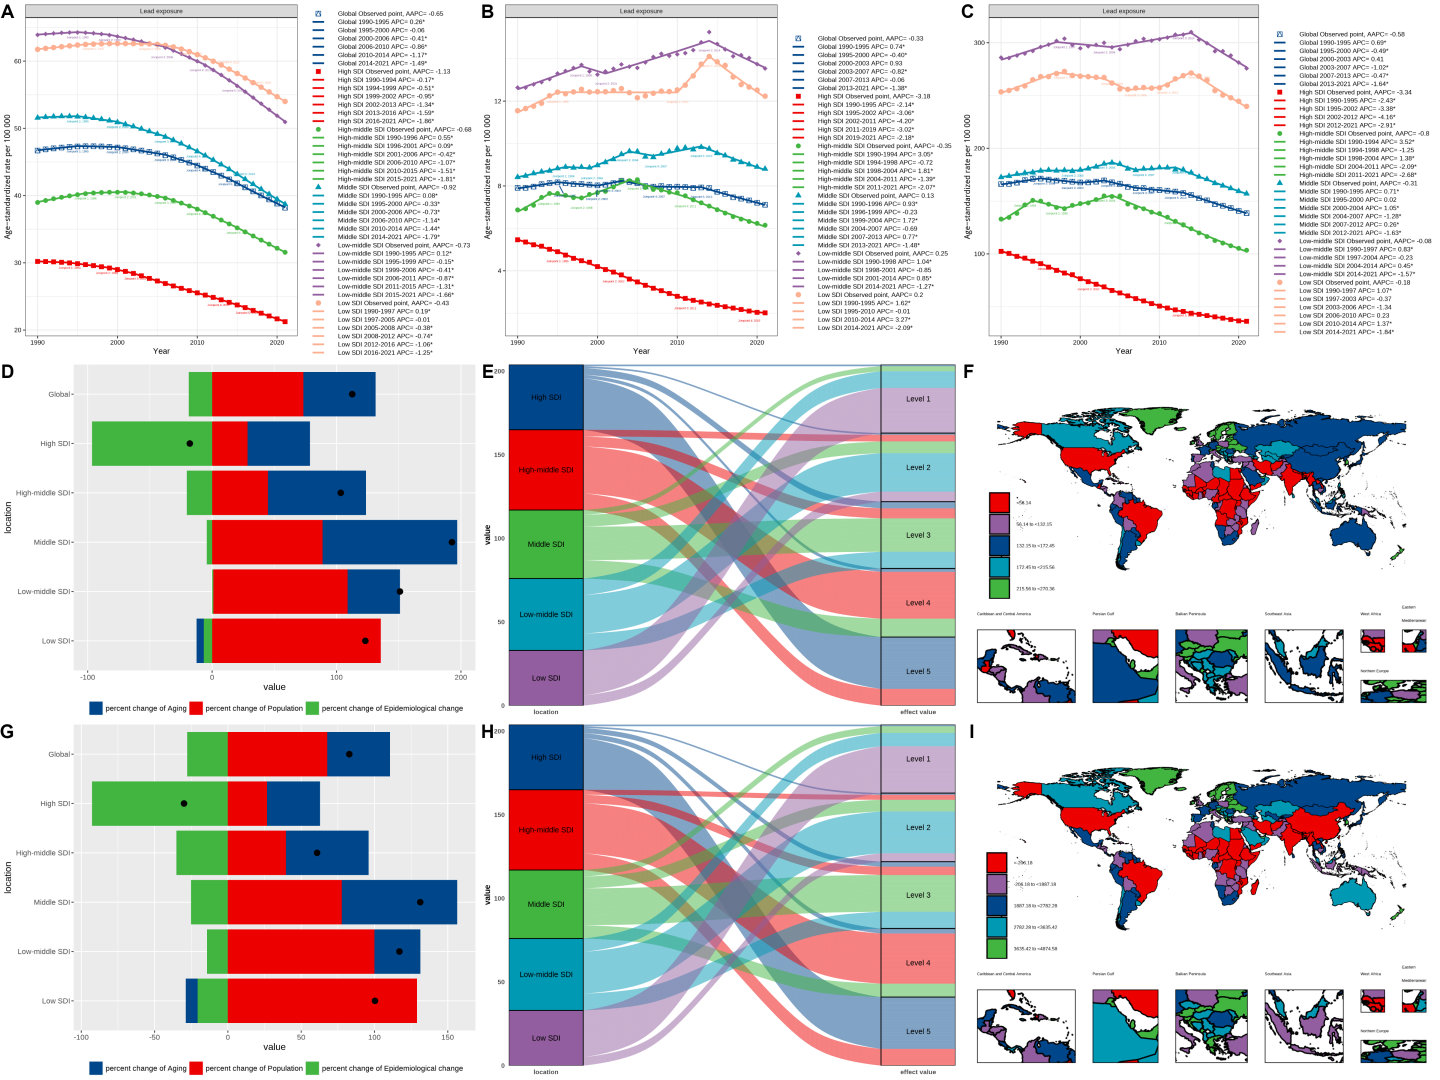


**Figure S10** Summary of analysis results for low physical activity. (**A)** The joinpoint regression analysis on SEV. (**B)** The joinpoint regression analysis on the ASR of deaths. (**C)** The joinpoint regression analysis on the ASR of DALYs. (**D)** Changes in deaths according to aging, population growth and epidemiological change from 1990 to 2021. (**E)** Changes in DALYs according to aging, population growth and epidemiological change from 1990 to 2021. (**F)** The correspondence between different regions and fixed effects quintiles of stroke related deaths. (**G)** The correspondence between different regions and fixed effects quintiles of stroke related DALYs. (**H)** The fixed-effects of deaths of 204 countries and territories. (**I)** The fixed-effects of DALYs of 204 countries and territories. **Abbreviations:** SEV, summary exposure value; ASR, age-standardized rate; DALYs, disability-adjusted life years.


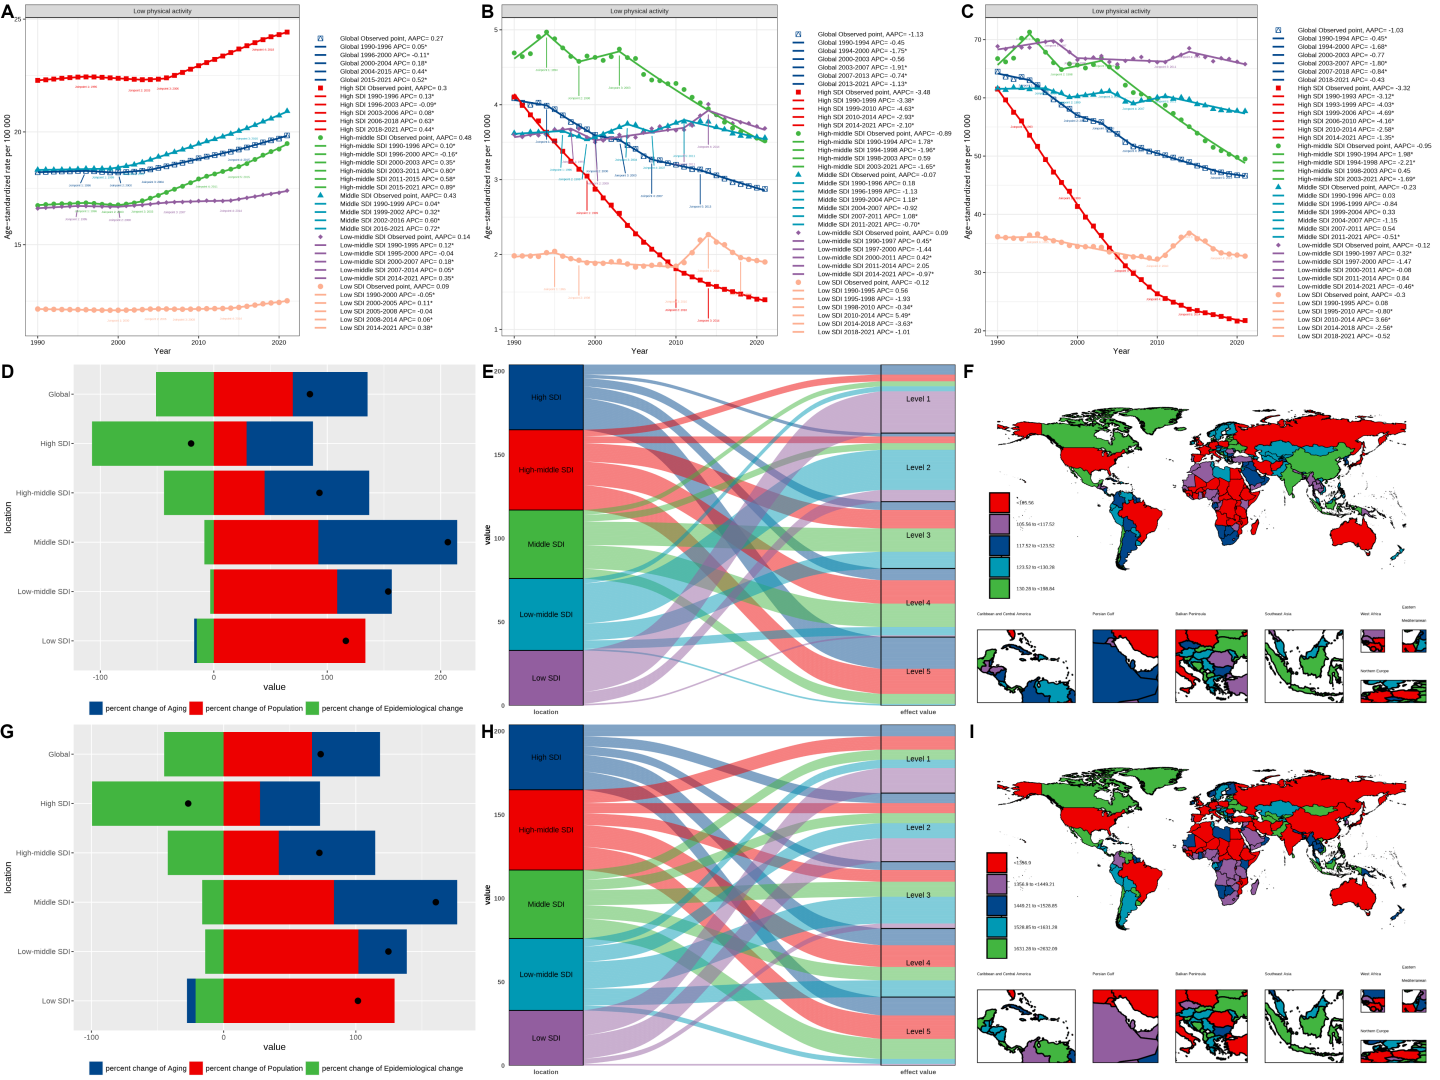


**Figure S11** Summary of analysis results for secondhand smoke. (**A)** The joinpoint regression analysis on SEV. (**B)** The joinpoint regression analysis on the ASR of deaths. (**C)** The joinpoint regression analysis on the ASR of DALYs. (**D)** Changes in deaths according to aging, population growth and epidemiological change from 1990 to 2021. (**E)** Changes in DALYs according to aging, population growth and epidemiological change from 1990 to 2021. (**F)** The correspondence between different regions and fixed effects quintiles of stroke related deaths. (**G)** The correspondence between different regions and fixed effects quintiles of stroke related DALYs. (**H)** The fixed-effects of deaths of 204 countries and territories. (**I)** The fixed-effects of DALYs of 204 countries and territories. **Abbreviations:** SEV, summary exposure value; ASR, age-standardized rate; DALYs, disability-adjusted life years.


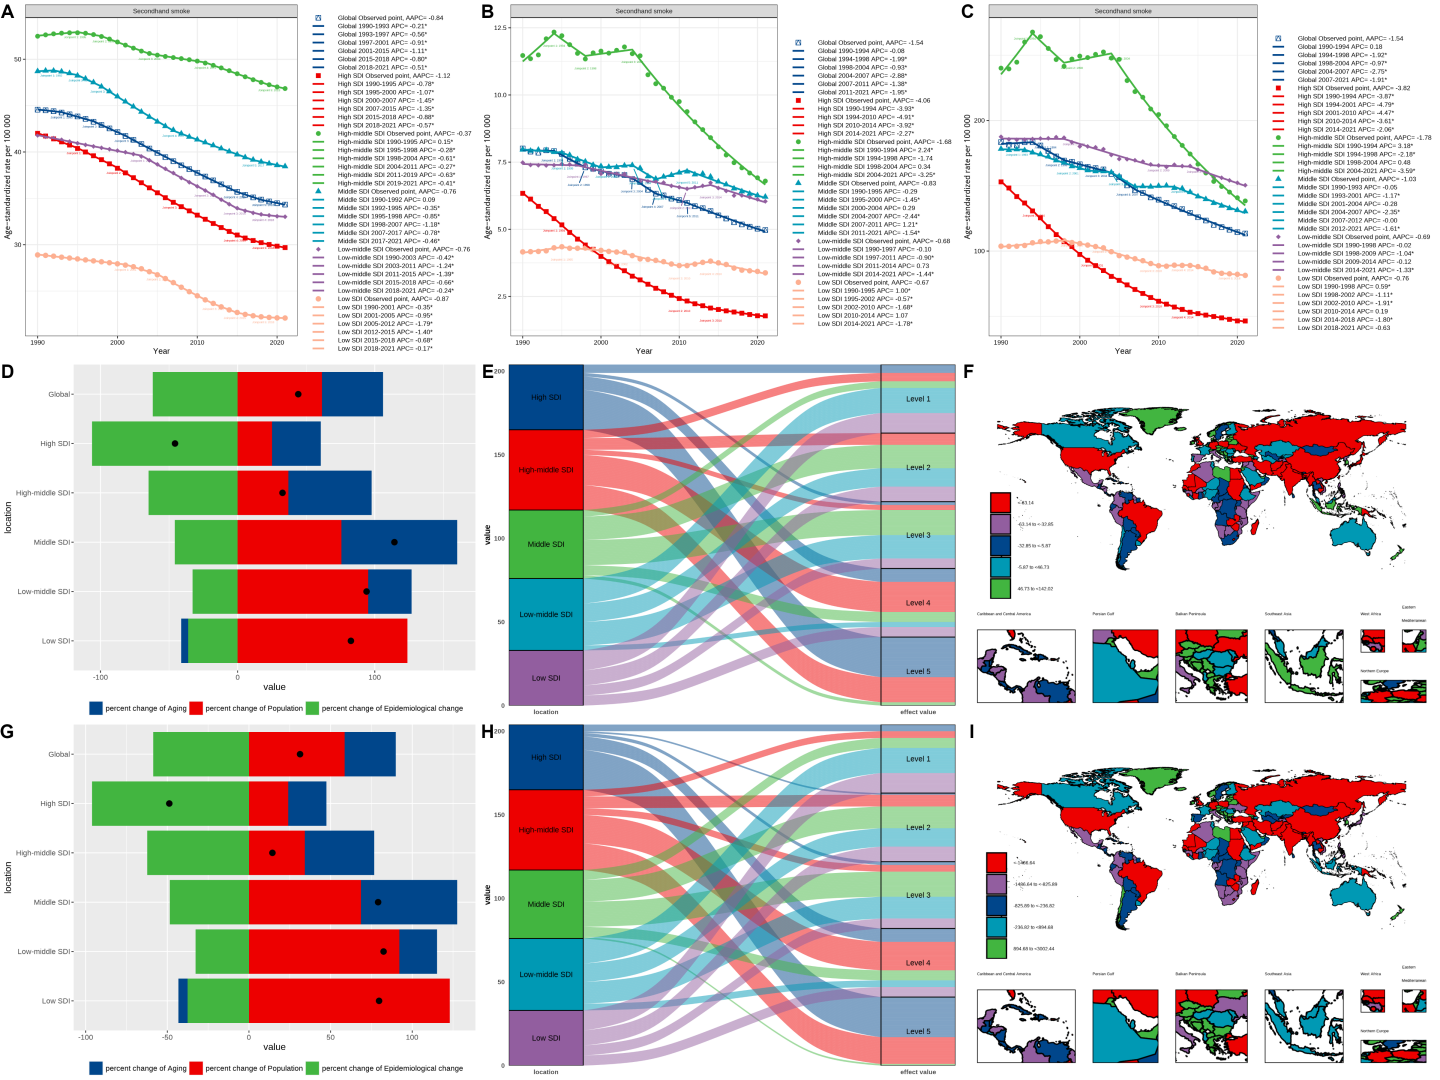


**Figure S12** Summary of analysis results for diet low in fruits. (**A)** The joinpoint regression analysis on SEV. (**B)** The joinpoint regression analysis on the ASR of deaths. (**C)** The joinpoint regression analysis on the ASR of DALYs. (**D)** Changes in deaths according to aging, population growth and epidemiological change from 1990 to 2021. (**E)** Changes in DALYs according to aging, population growth and epidemiological change from 1990 to 2021. (**F)** The correspondence between different regions and fixed effects quintiles of stroke related deaths. (**G)** The correspondence between different regions and fixed effects quintiles of stroke related DALYs. (**H)** The fixed-effects of deaths of 204 countries and territories. (**I)** The fixed-effects of DALYs of 204 countries and territories. **Abbreviations:** SEV, summary exposure value; ASR, age-standardized rate; DALYs, disability-adjusted life years.


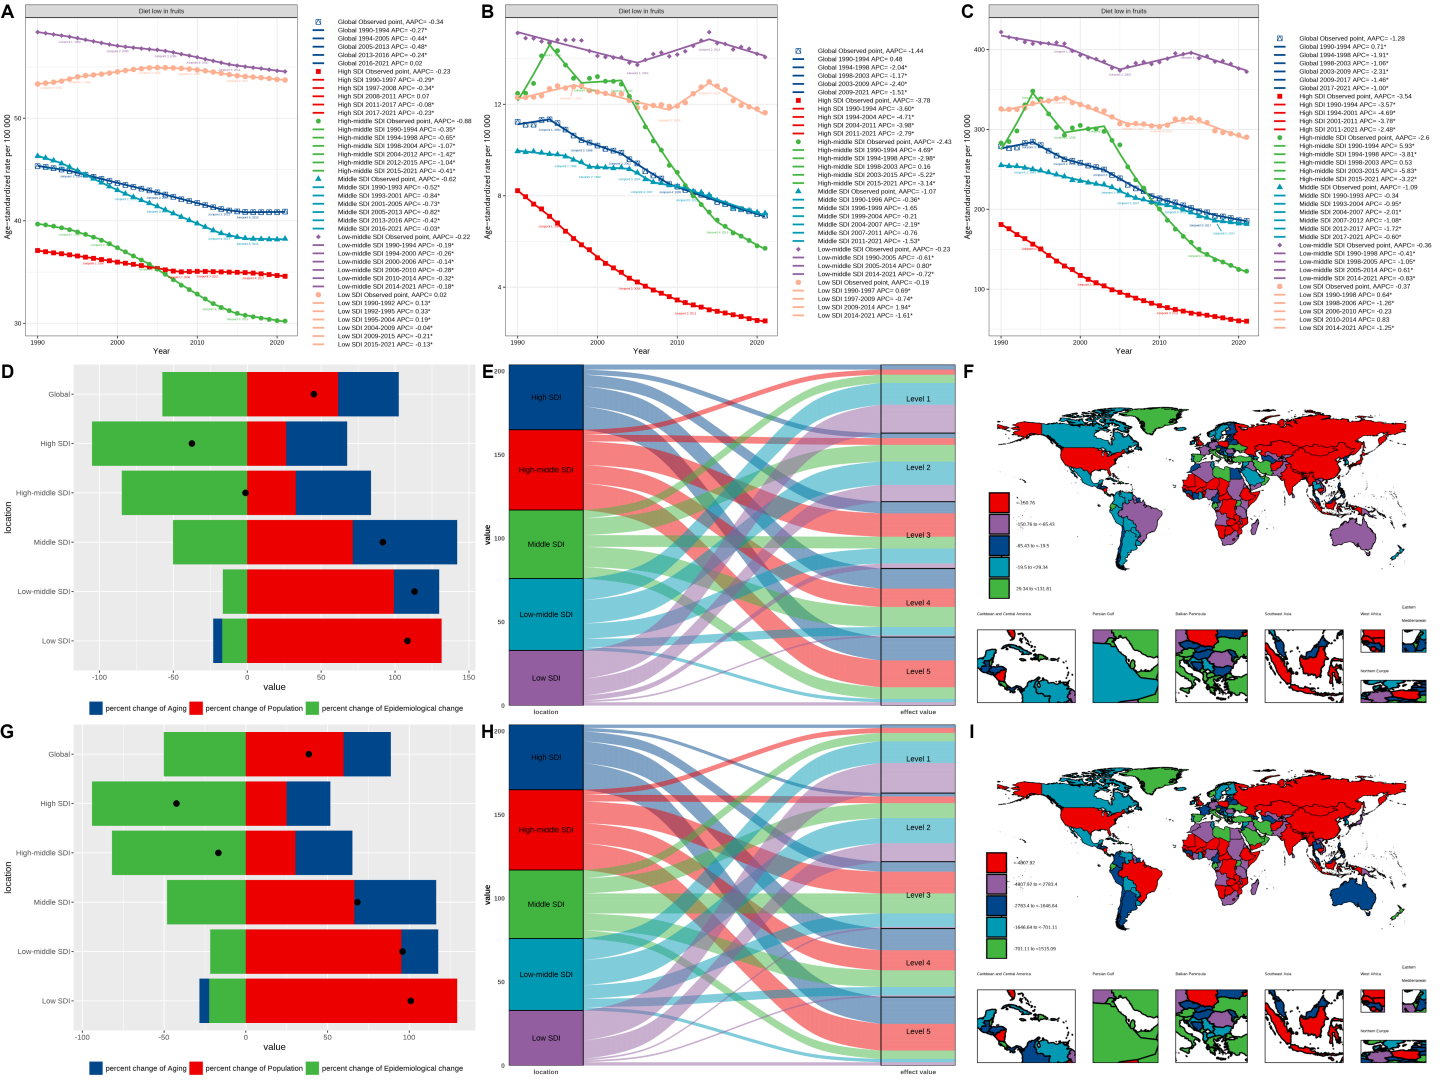


**Figure S13** Summary of analysis results for diet low in vegetables. (**A)** The joinpoint regression analysis on SEV. (**B)** The joinpoint regression analysis on the ASR of deaths. (**C)** The joinpoint regression analysis on the ASR of DALYs. (**D)** Changes in deaths according to aging, population growth and epidemiological change from 1990 to 2021. (**E)** Changes in DALYs according to aging, population growth and epidemiological change from 1990 to 2021. (**F)** The correspondence between different regions and fixed effects quintiles of stroke related deaths. (**G)** The correspondence between different regions and fixed effects quintiles of stroke related DALYs. (**H)** The fixed-effects of deaths of 204 countries and territories. (**I)** The fixed-effects of DALYs of 204 countries and territories. **Abbreviations:** SEV, summary exposure value; ASR, age-standardized rate; DALYs, disability-adjusted life years.


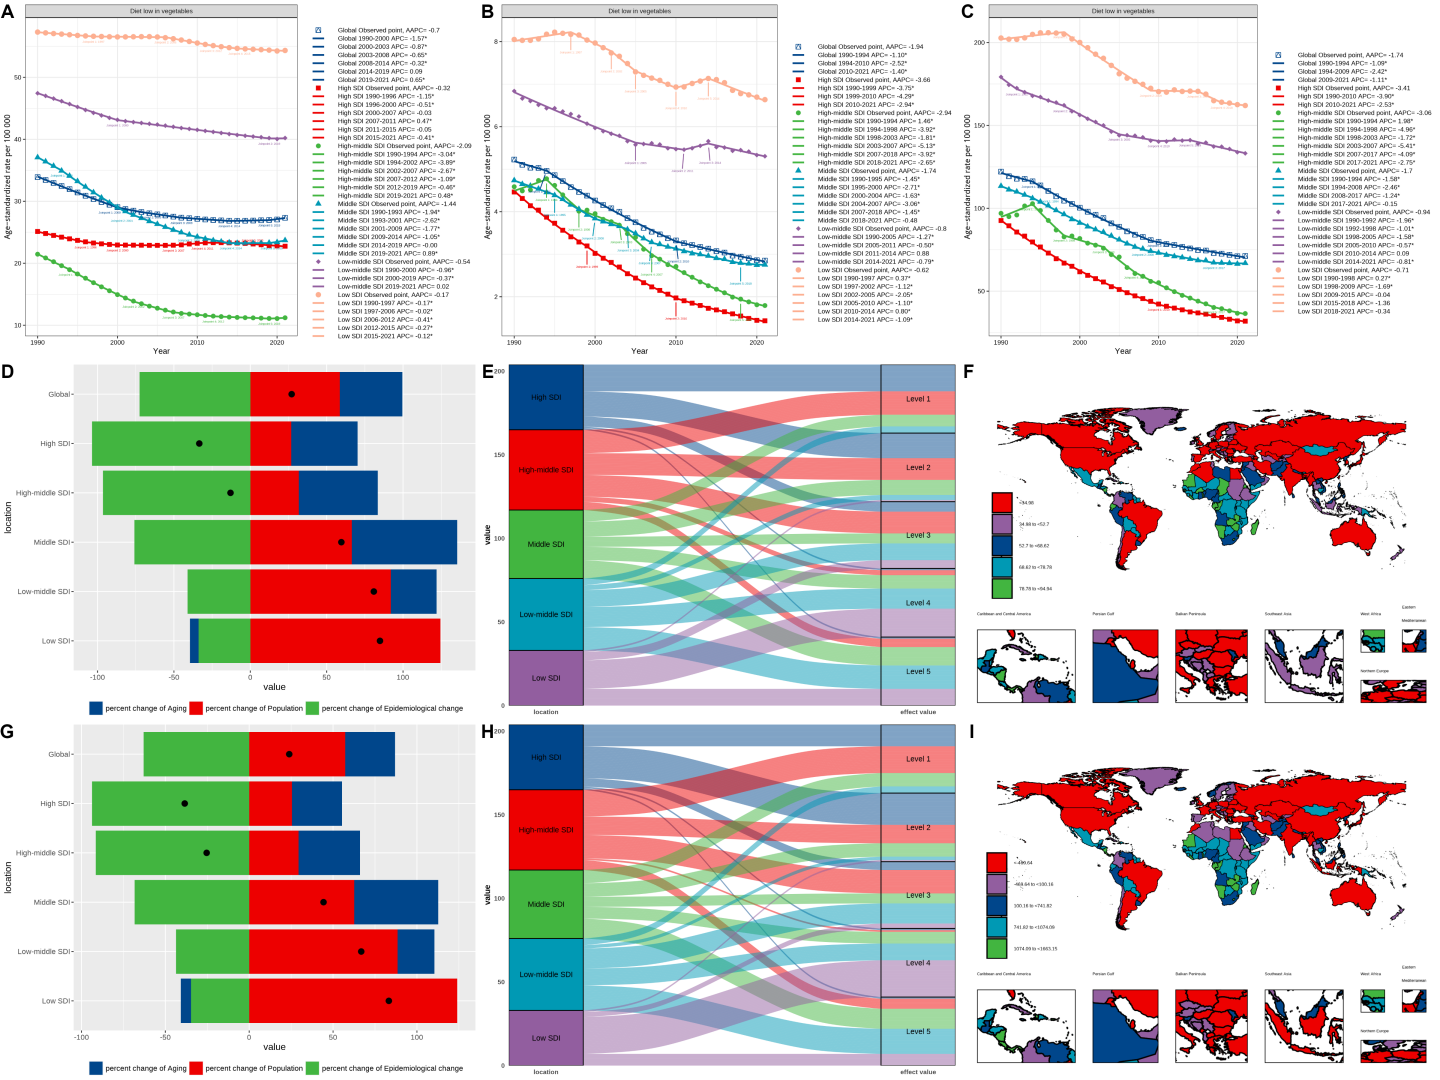


**Figure S14** Summary of analysis results for diet high in red meat. (**A)** The joinpoint regression analysis on SEV. (**B)** The joinpoint regression analysis on the ASR of deaths. (**C)** The joinpoint regression analysis on the ASR of DALYs. (**D)** Changes in deaths according to aging, population growth and epidemiological change from 1990 to 2021. (**E)** Changes in DALYs according to aging, population growth and epidemiological change from 1990 to 2021. (**F)** The correspondence between different regions and fixed effects quintiles of stroke related deaths. (**G)** The correspondence between different regions and fixed effects quintiles of stroke related DALYs. (**H)** The fixed-effects of deaths of 204 countries and territories. (**I)** The fixed-effects of DALYs of 204 countries and territories. **Abbreviations:** SEV, summary exposure value; ASR, age-standardized rate; DALYs, disability-adjusted life years.


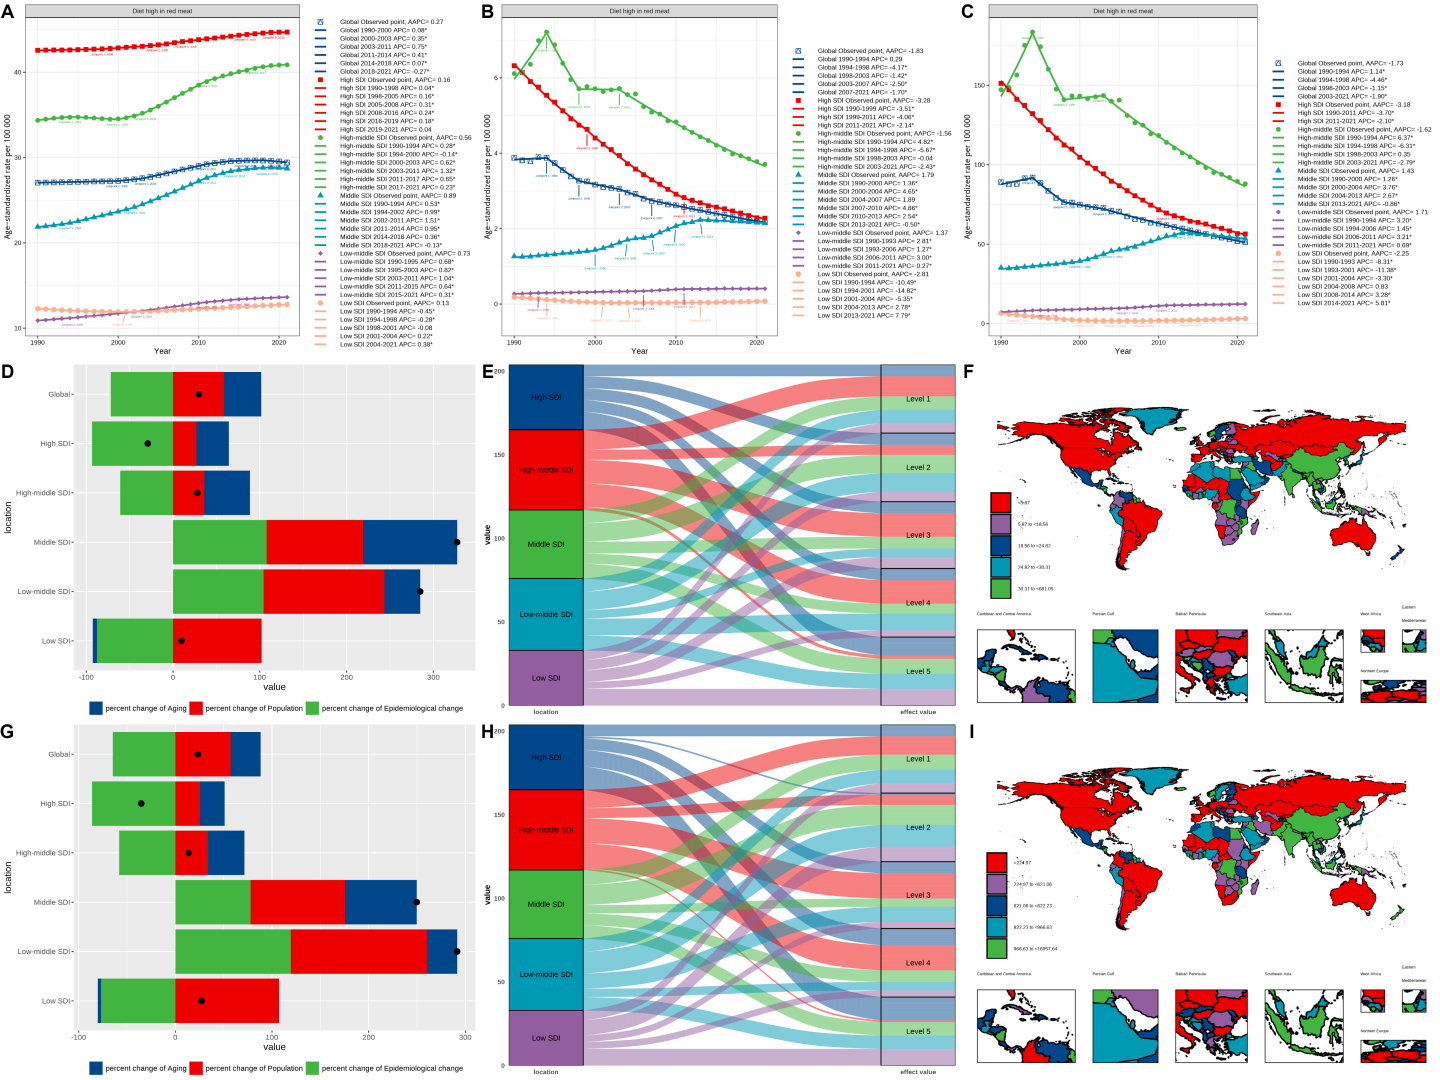


**Figure S15** Summary of analysis results for diet high in processed meat. (**A)** The joinpoint regression analysis on SEV. (**B)** The joinpoint regression analysis on the ASR of deaths. (**C)** The joinpoint regression analysis on the ASR of DALYs. (**D)** Changes in deaths according to aging, population growth and epidemiological change from 1990 to 2021. (**E)** Changes in DALYs according to aging, population growth and epidemiological change from 1990 to 2021. (**F)** The correspondence between different regions and fixed effects quintiles of stroke related deaths. (**G)** The correspondence between different regions and fixed effects quintiles of stroke related DALYs. (**H)** The fixed-effects of deaths of 204 countries and territories. (**I)** The fixed-effects of DALYs of 204 countries and territories. **Abbreviations:** SEV, summary exposure value; ASR, age-standardized rate; DALYs, disability-adjusted life years.


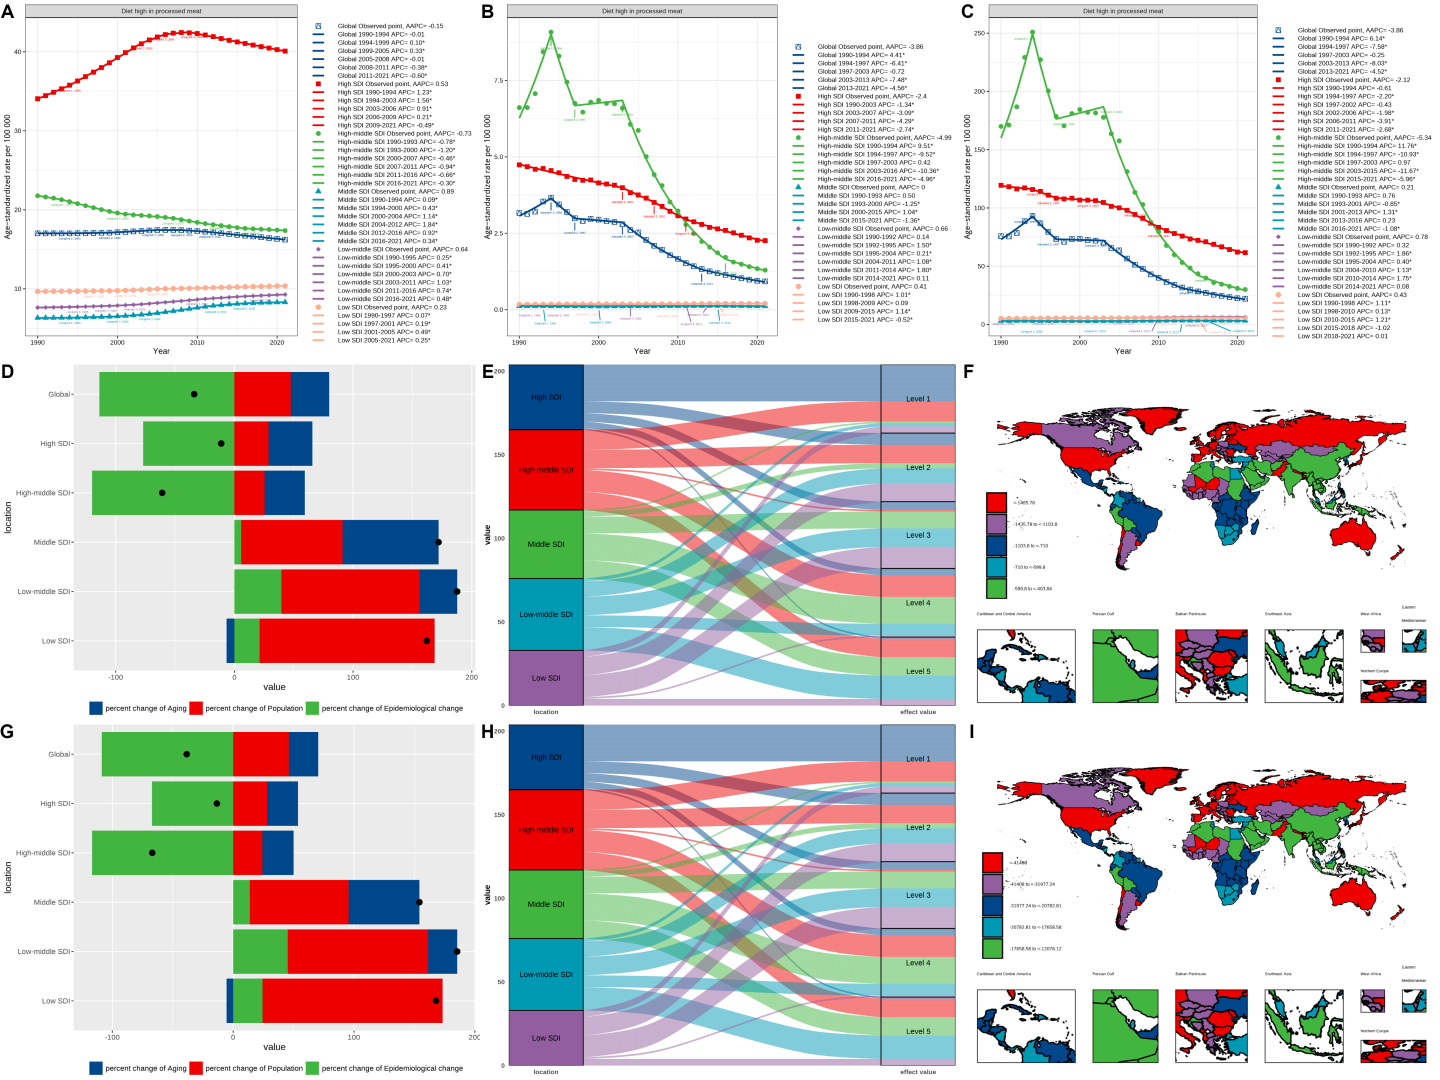


**Figure S16** Summary of analysis results for diet high in sugar-sweetened beverages. (**A)** The joinpoint regression analysis on SEV. (**B)** The joinpoint regression analysis on the ASR of deaths. (**C)** The joinpoint regression analysis on the ASR of DALYs. (**D)** Changes in deaths according to aging, population growth and epidemiological change from 1990 to 2021. (**E)** Changes in DALYs according to aging, population growth and epidemiological change from 1990 to 2021. (**F)** The correspondence between different regions and fixed effects quintiles of stroke related deaths. (**G)** The correspondence between different regions and fixed effects quintiles of stroke related DALYs. (**H)** The fixed-effects of deaths of 204 countries and territories. (**I)** The fixed-effects of DALYs of 204 countries and territories. **Abbreviations:** SEV, summary exposure value; ASR, age-standardized rate; DALYs, disability-adjusted life years.


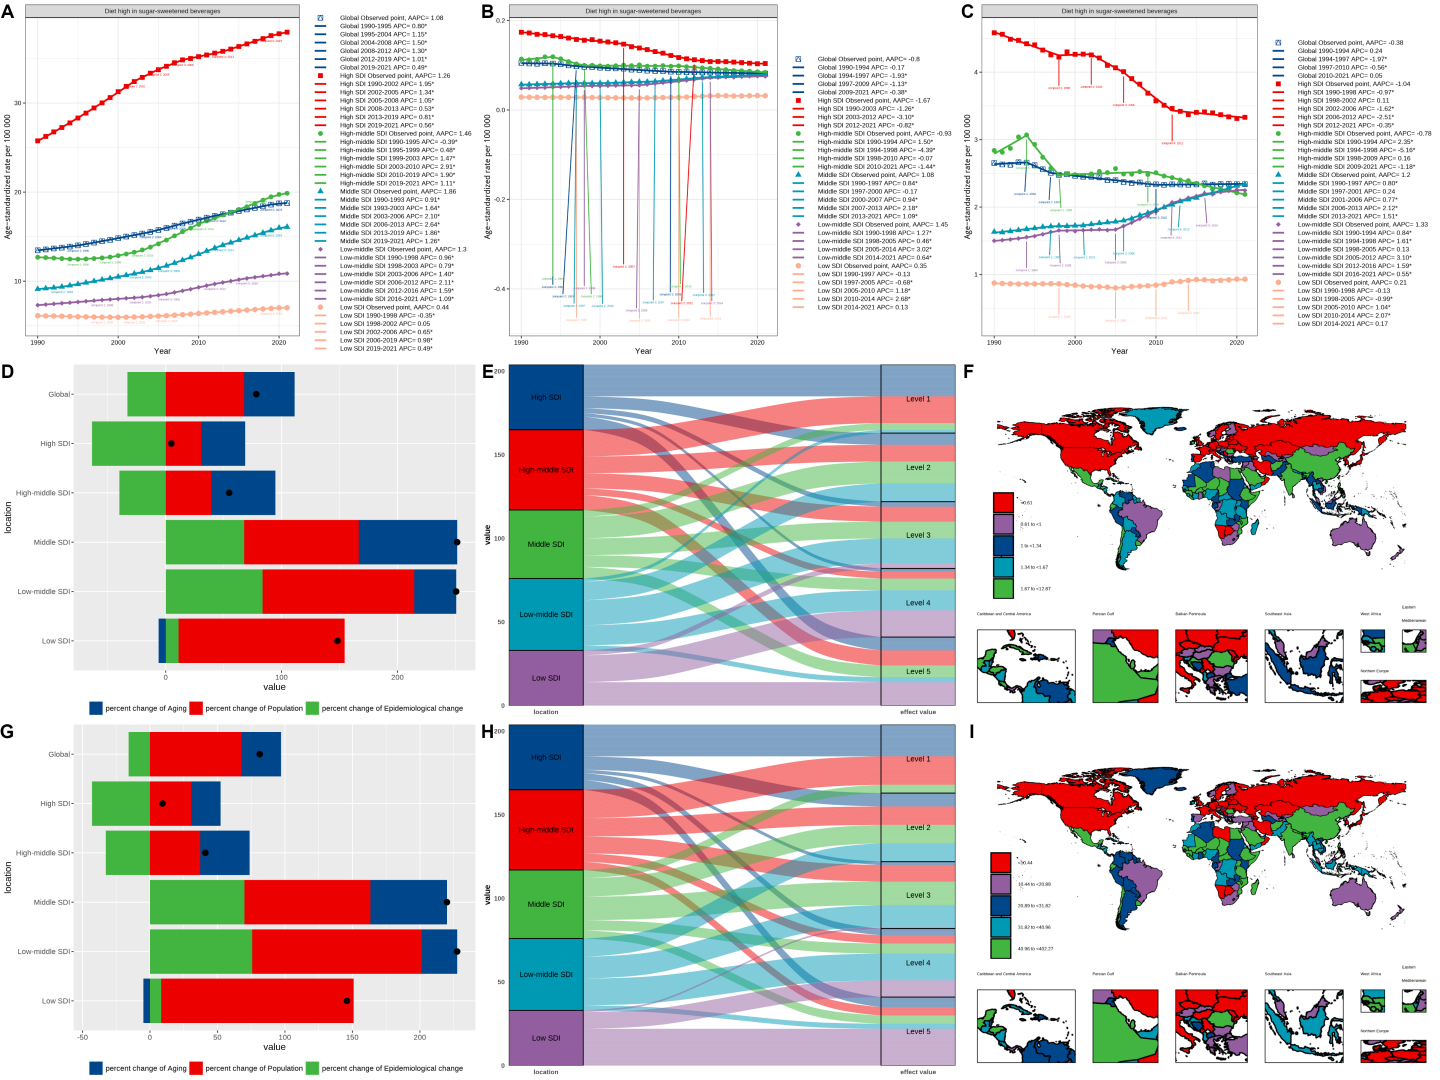


**Figure S17** Summary of analysis results for diet low in fiber. (**A)** The joinpoint regression analysis on SEV. (**B)** The joinpoint regression analysis on the ASR of deaths. (**C)** The joinpoint regression analysis on the ASR of DALYs. (**D)** Changes in deaths according to aging, population growth and epidemiological change from 1990 to 2021. (**E)** Changes in DALYs according to aging, population growth and epidemiological change from 1990 to 2021. (**F)** The correspondence between different regions and fixed effects quintiles of stroke related deaths. (**G)** The correspondence between different regions and fixed effects quintiles of stroke related DALYs. (**H)** The fixed-effects of deaths of 204 countries and territories. (**I)** The fixed-effects of DALYs of 204 countries and territories. **Abbreviations:** SEV, summary exposure value; ASR, age-standardized rate; DALYs, disability-adjusted life years.


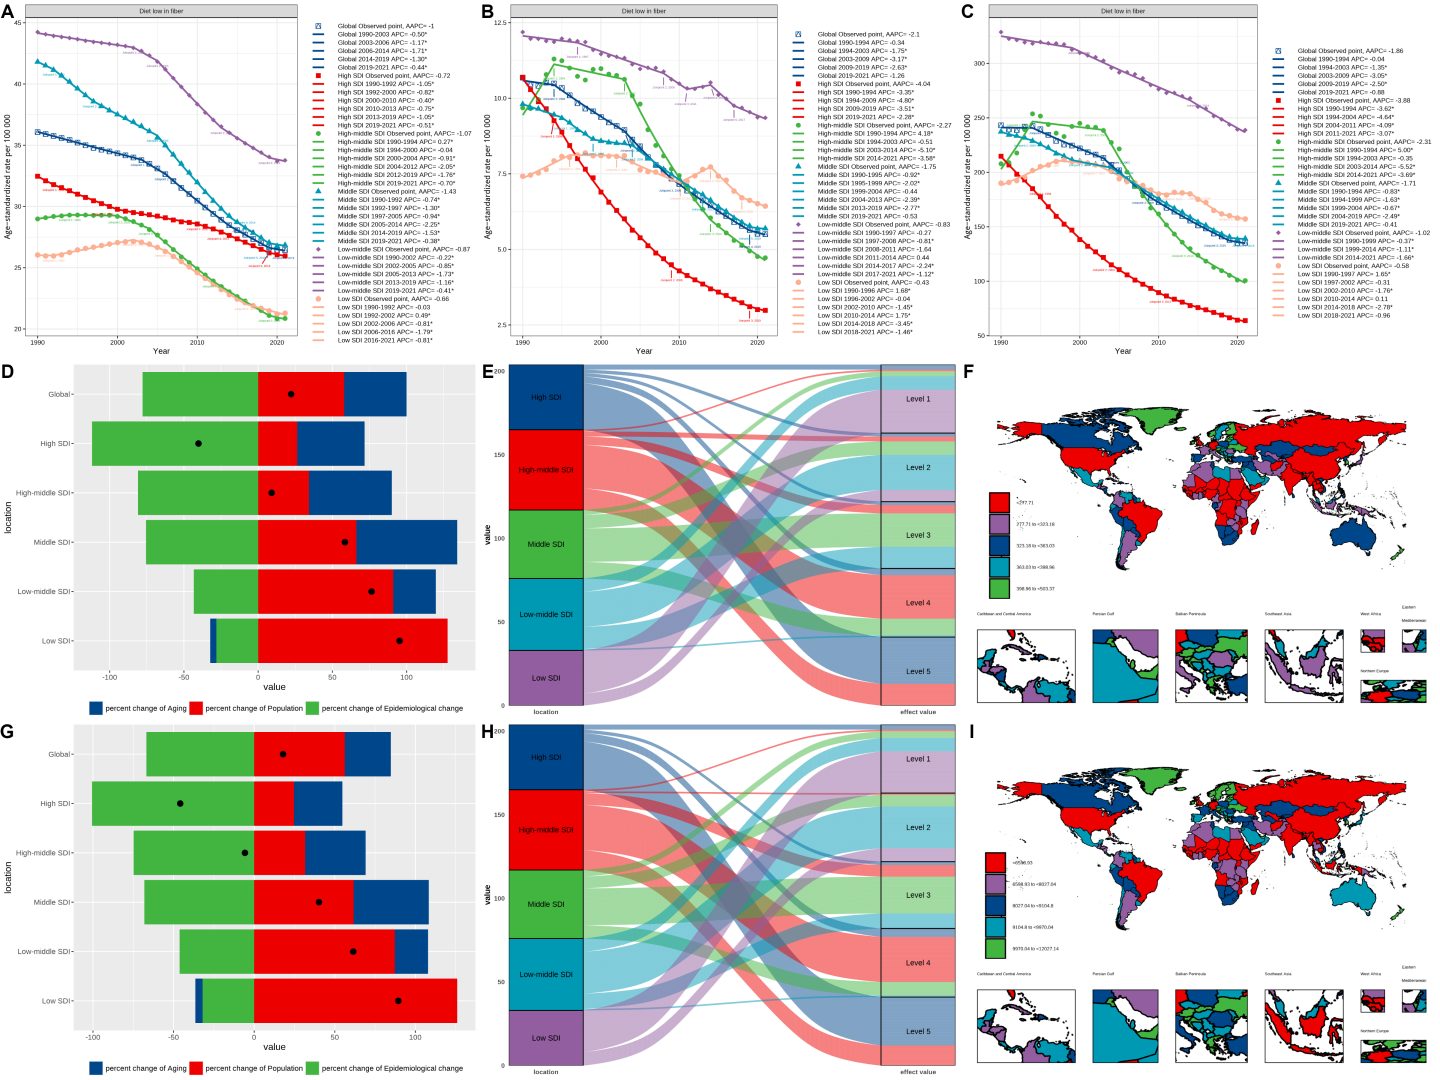


**Figure S18** Summary of analysis results for diet low in polyunsaturated fatty acids. (**A)** The joinpoint regression analysis on SEV. (**B)** The joinpoint regression analysis on the ASR of deaths. (**C)** The joinpoint regression analysis on the ASR of DALYs. (**D)** Changes in deaths according to aging, population growth and epidemiological change from 1990 to 2021. (**E)** Changes in DALYs according to aging, population growth and epidemiological change from 1990 to 2021. (**F)** The correspondence between different regions and fixed effects quintiles of stroke related deaths. (**G)** The correspondence between different regions and fixed effects quintiles of stroke related DALYs. (**H)** The fixed-effects of deaths of 204 countries and territories. (**I)** The fixed-effects of DALYs of 204 countries and territories. **Abbreviations:** SEV, summary exposure value; ASR, age-standardized rate; DALYs, disability-adjusted life years.


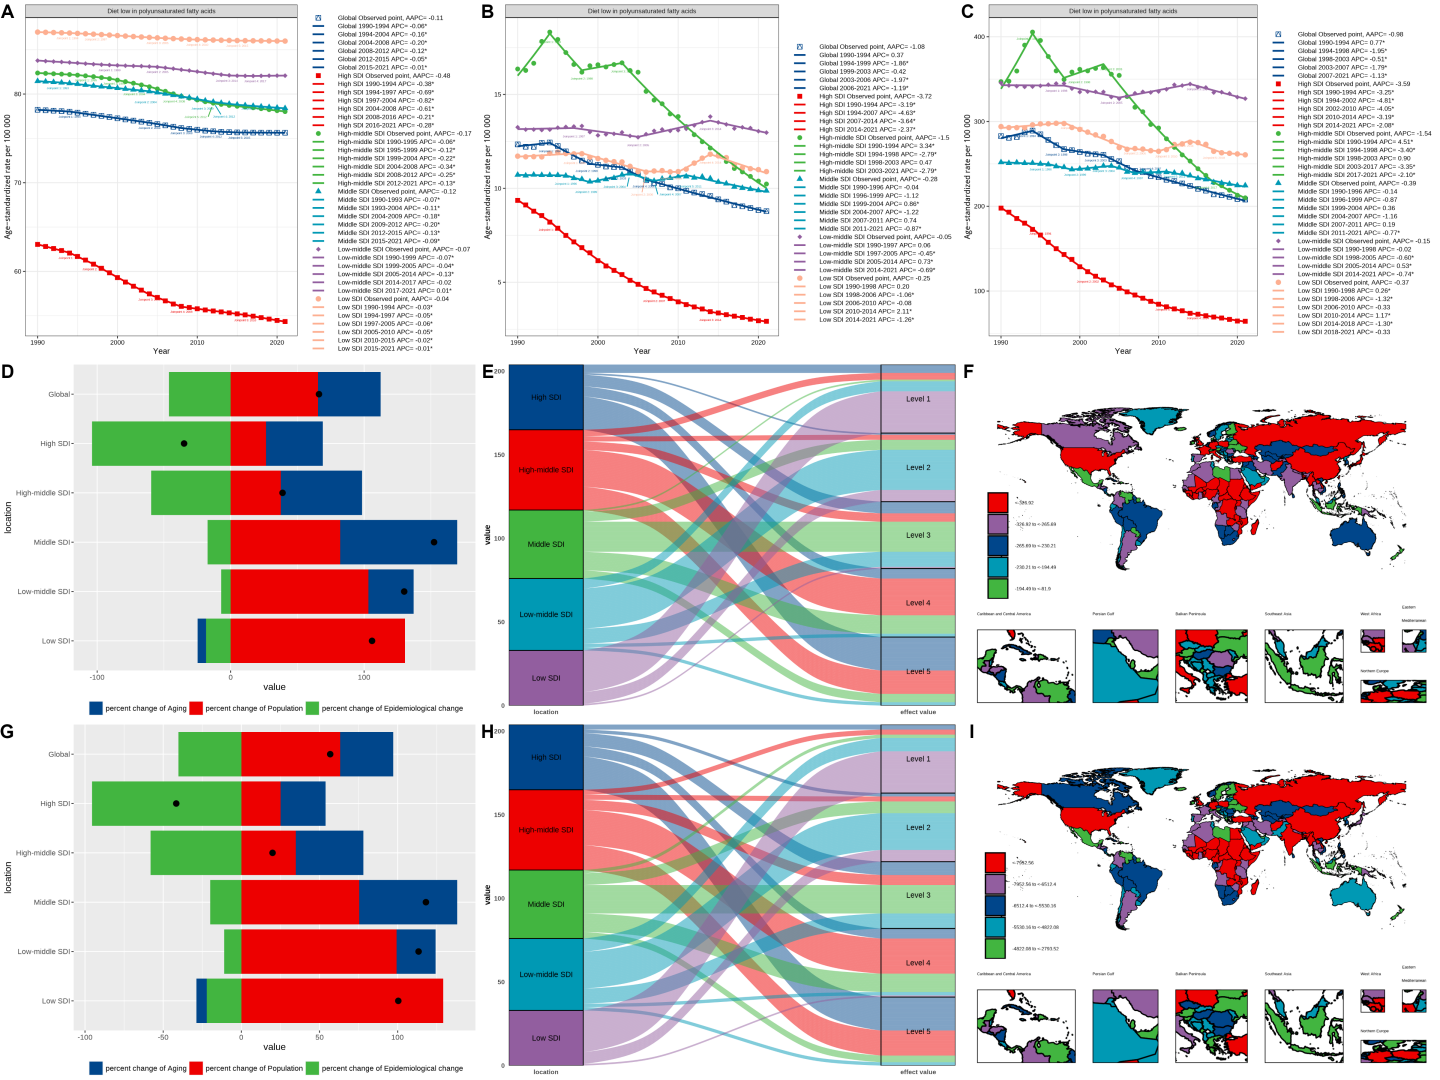


**Figure S19** Summary of analysis results for diet high in sodium. (**A)** The joinpoint regression analysis on SEV. (**B)** The joinpoint regression analysis on the ASR of deaths. (**C)** The joinpoint regression analysis on the ASR of DALYs. (**D)** Changes in deaths according to aging, population growth and epidemiological change from 1990 to 2021. (**E)** Changes in DALYs according to aging, population growth and epidemiological change from 1990 to 2021. (**F)** The correspondence between different regions and fixed effects quintiles of stroke related deaths. (**G)** The correspondence between different regions and fixed effects quintiles of stroke related DALYs. (**H)** The fixed-effects of deaths of 204 countries and territories. (**I)** The fixed-effects of DALYs of 204 countries and territories. **Abbreviations:** SEV, summary exposure value; ASR, age-standardized rate; DALYs, disability-adjusted life years.


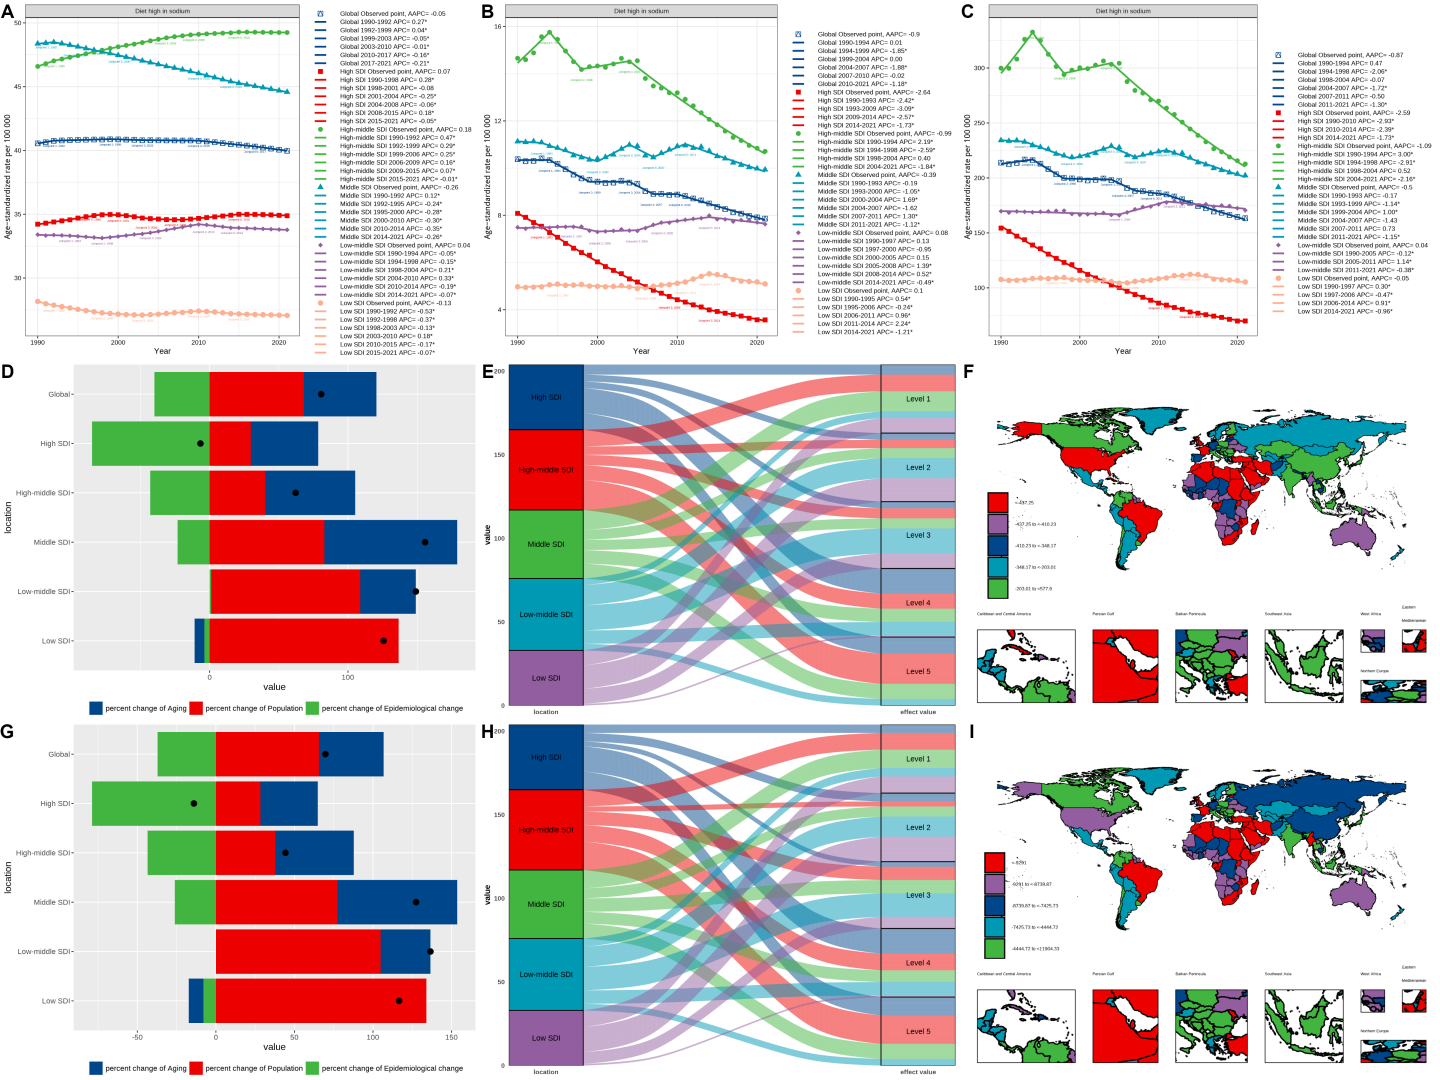


**Figure S20** Summary of analysis results for diet low in legumes. (**A)** The joinpoint regression analysis on SEV. (**B)** The joinpoint regression analysis on the ASR of deaths. (**C)** The joinpoint regression analysis on the ASR of DALYs. (**D)** Changes in deaths according to aging, population growth and epidemiological change from 1990 to 2021. (**E)** Changes in DALYs according to aging, population growth and epidemiological change from 1990 to 2021. (**F)** The correspondence between different regions and fixed effects quintiles of stroke related deaths. (**G)** The correspondence between different regions and fixed effects quintiles of stroke related DALYs. (**H)** The fixed-effects of deaths of 204 countries and territories. (**I)** The fixed-effects of DALYs of 204 countries and territories. **Abbreviations:** SEV, summary exposure value; ASR, age-standardized rate; DALYs, disability-adjusted life years.


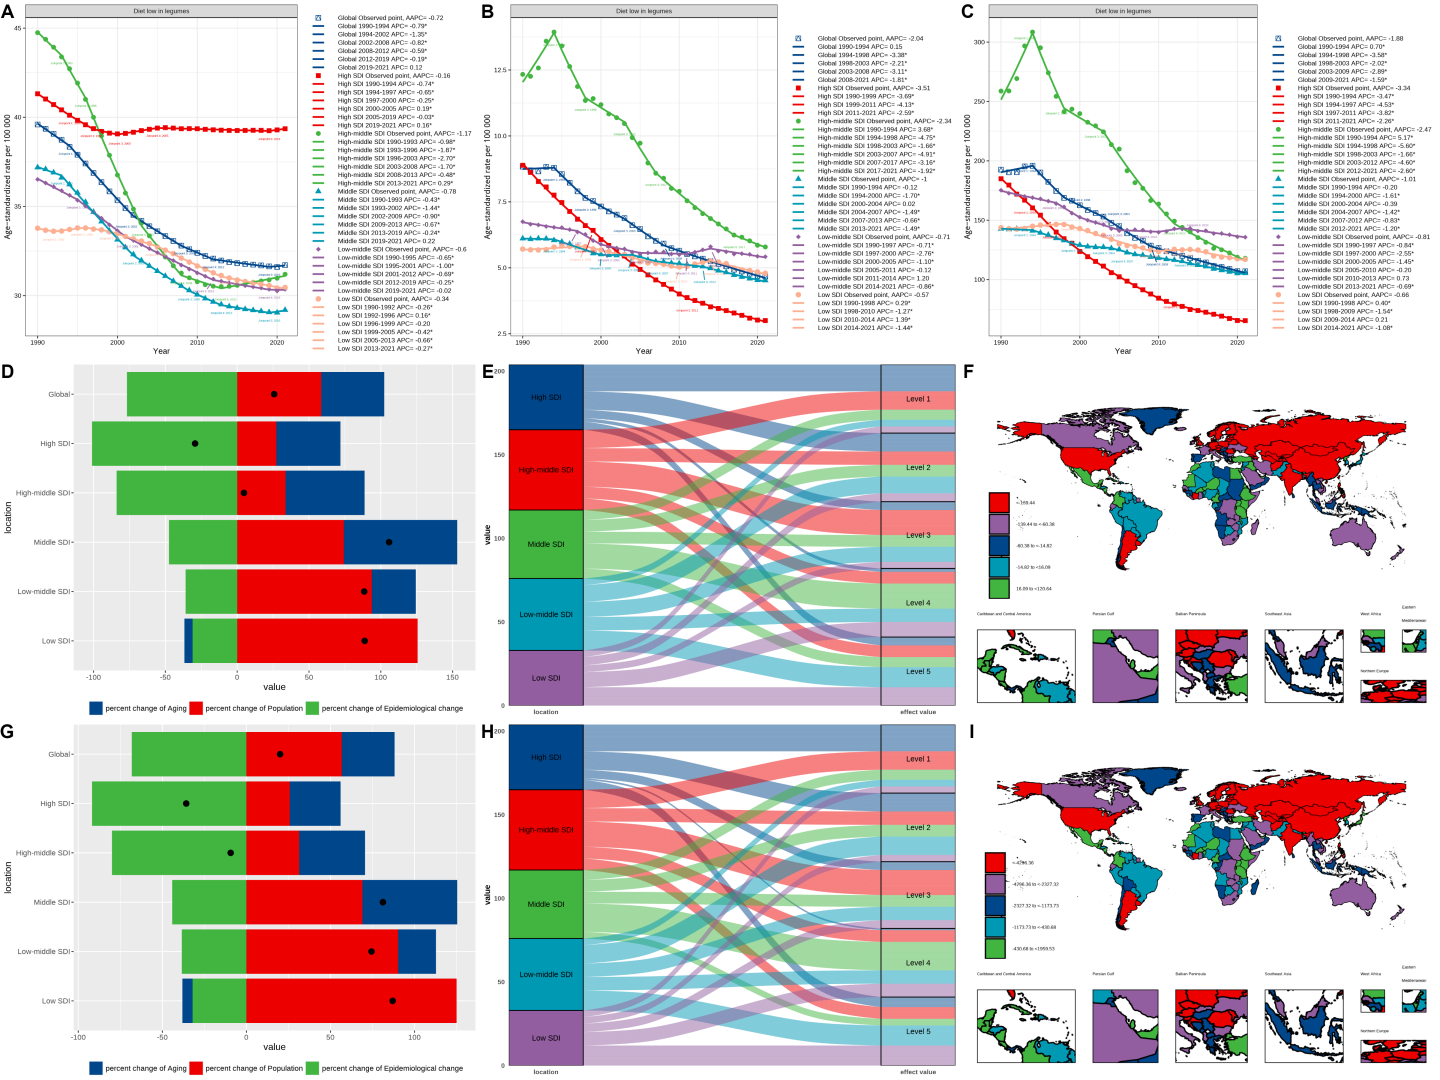


**Figure S21** Summary of analysis results for diet low in nuts and seeds. (**A)** The joinpoint regression analysis on SEV. (**B)** The joinpoint regression analysis on the ASR of deaths. (**C)** The joinpoint regression analysis on the ASR of DALYs. (**D)** Changes in deaths according to aging, population growth and epidemiological change from 1990 to 2021. (**E)** Changes in DALYs according to aging, population growth and epidemiological change from 1990 to 2021. (**F)** The correspondence between different regions and fixed effects quintiles of stroke related deaths. (**G)** The correspondence between different regions and fixed effects quintiles of stroke related DALYs. (**H)** The fixed-effects of deaths of 204 countries and territories. (**I)** The fixed-effects of DALYs of 204 countries and territories. **Abbreviations:** SEV, summary exposure value; ASR, age-standardized rate; DALYs, disability-adjusted life years.


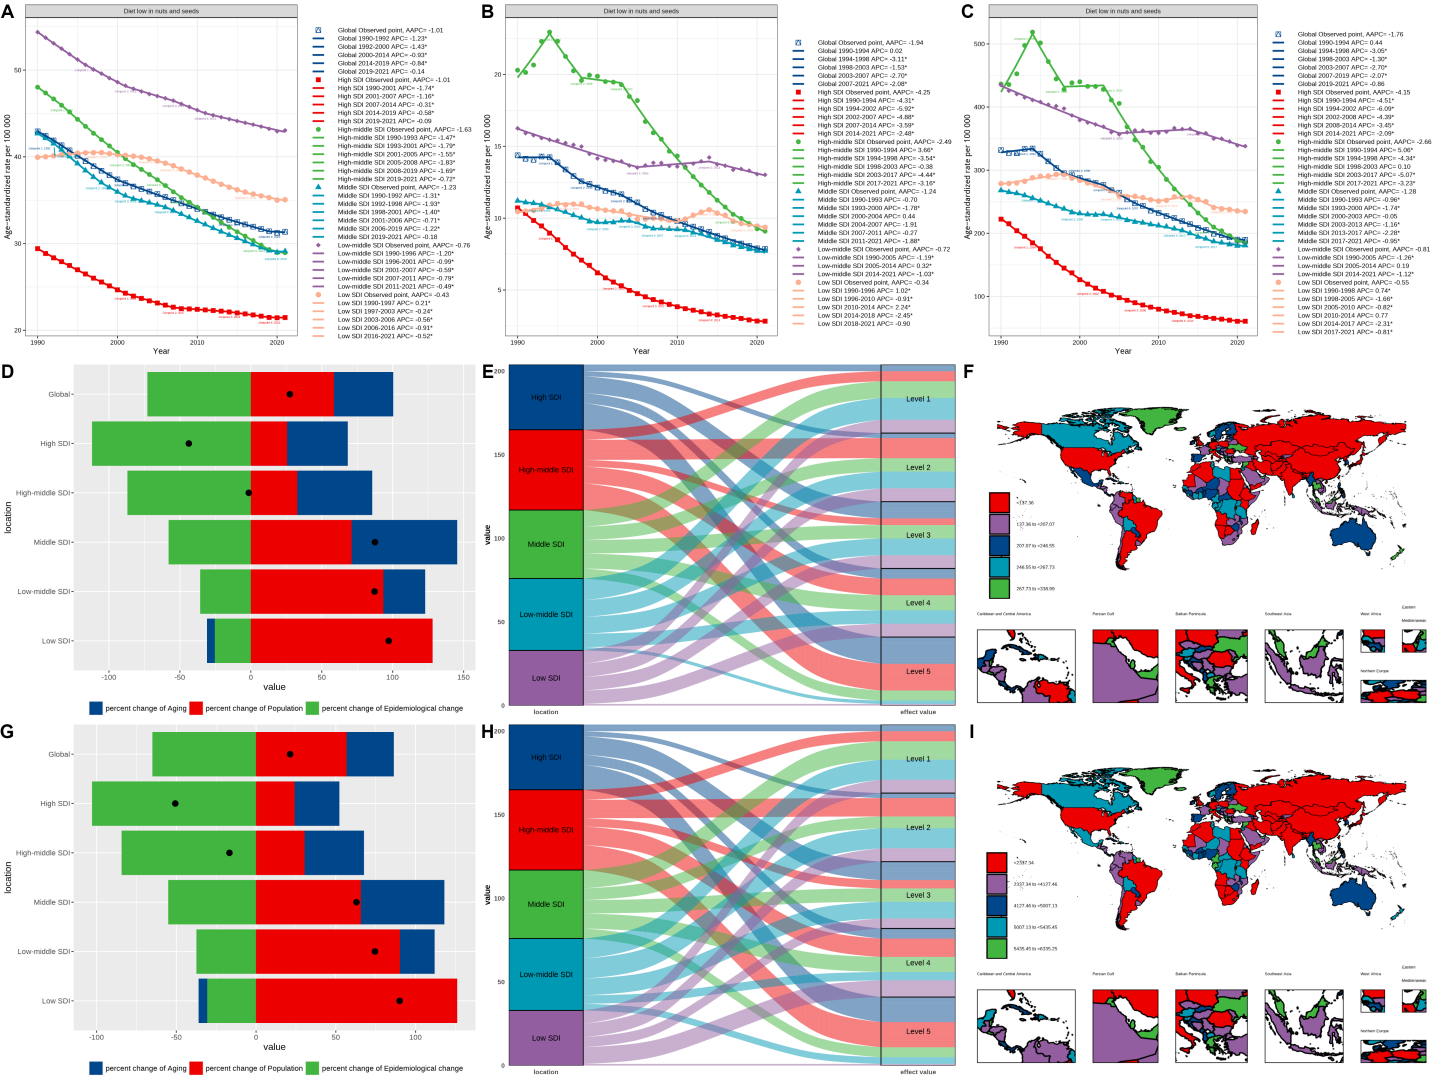


**Figure S22** Summary of analysis results for diet low in seafood omega-3 fatty acids. (**A)** The joinpoint regression analysis on SEV. (**B)** The joinpoint regression analysis on the ASR of deaths. (**C)** The joinpoint regression analysis on the ASR of DALYs. (**D)** Changes in deaths according to aging, population growth and epidemiological change from 1990 to 2021. (**E)** Changes in DALYs according to aging, population growth and epidemiological change from 1990 to 2021. (**F)** The correspondence between different regions and fixed effects quintiles of stroke related deaths. (**G)** The correspondence between different regions and fixed effects quintiles of stroke related DALYs. (**H)** The fixed-effects of deaths of 204 countries and territories. (**I)** The fixed-effects of DALYs of 204 countries and territories. **Abbreviations:** SEV, summary exposure value; ASR, age-standardized rate; DALYs, disability-adjusted life years.


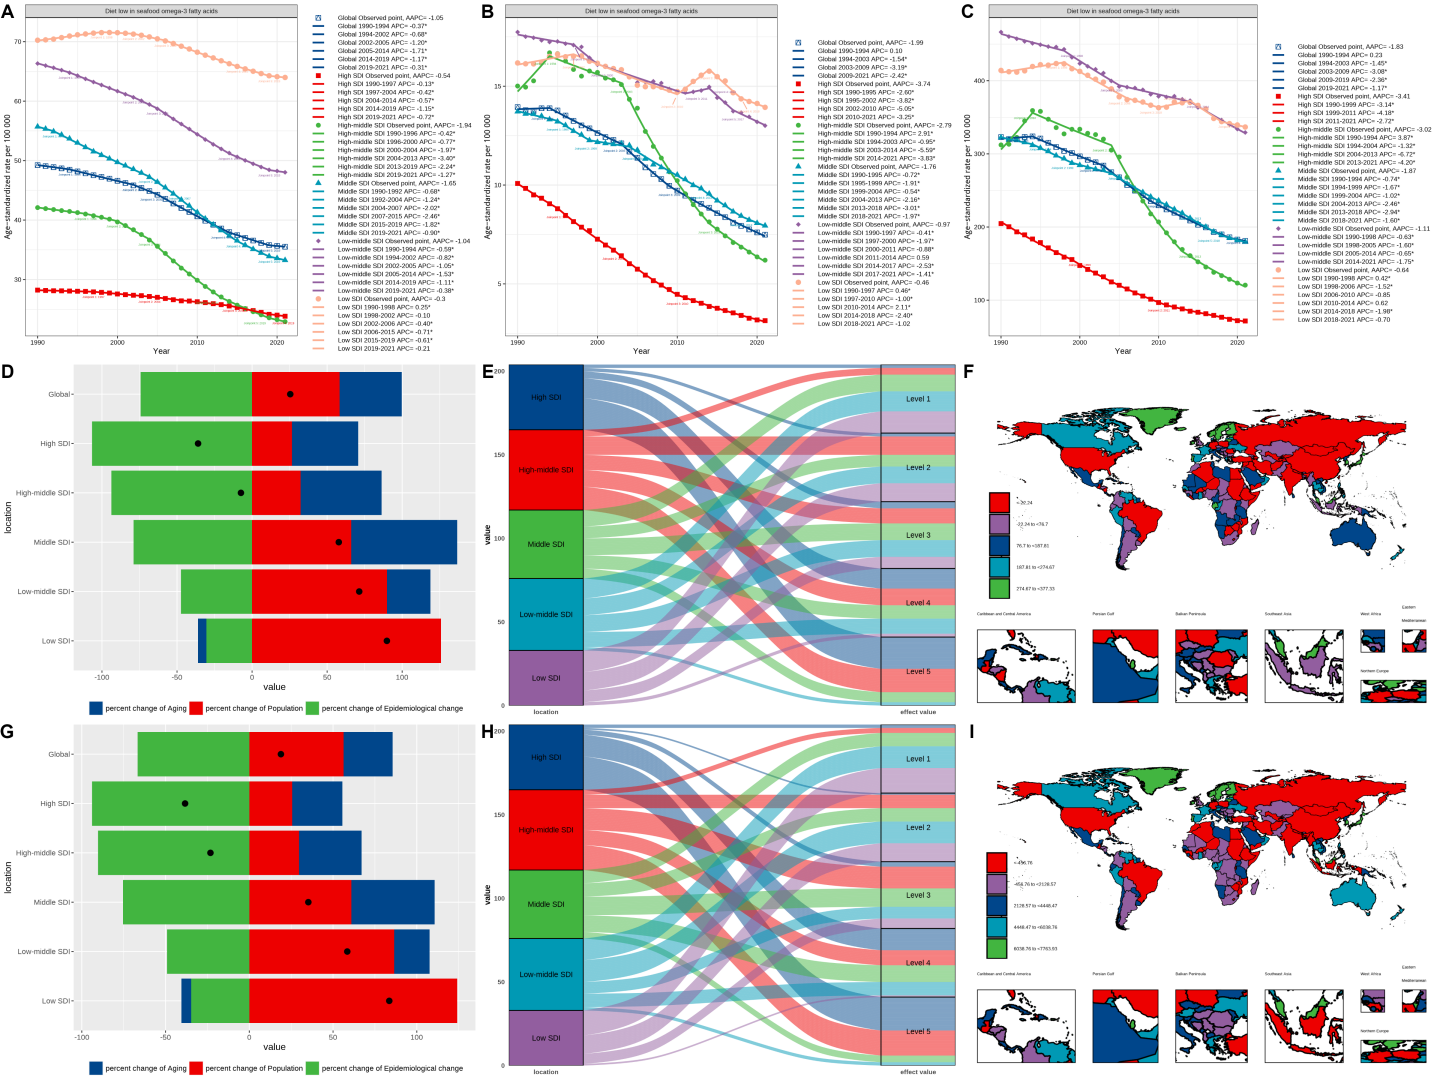


**Figure S23** Summary of analysis results for high fasting plasma glucose. (**A)** The joinpoint regression analysis on SEV. (**B)** The joinpoint regression analysis on the ASR of deaths. (**C)** The joinpoint regression analysis on the ASR of DALYs. (**D)** Changes in deaths according to aging, population growth and epidemiological change from 1990 to 2021. (**E)** Changes in DALYs according to aging, population growth and epidemiological change from 1990 to 2021. (**F)** The correspondence between different regions and fixed effects quintiles of stroke related deaths. (**G)** The correspondence between different regions and fixed effects quintiles of stroke related DALYs. (**H)** The fixed-effects of deaths of 204 countries and territories. (**I)** The fixed-effects of DALYs of 204 countries and territories. **Abbreviations:** SEV, summary exposure value; ASR, age-standardized rate; DALYs, disability-adjusted life years.


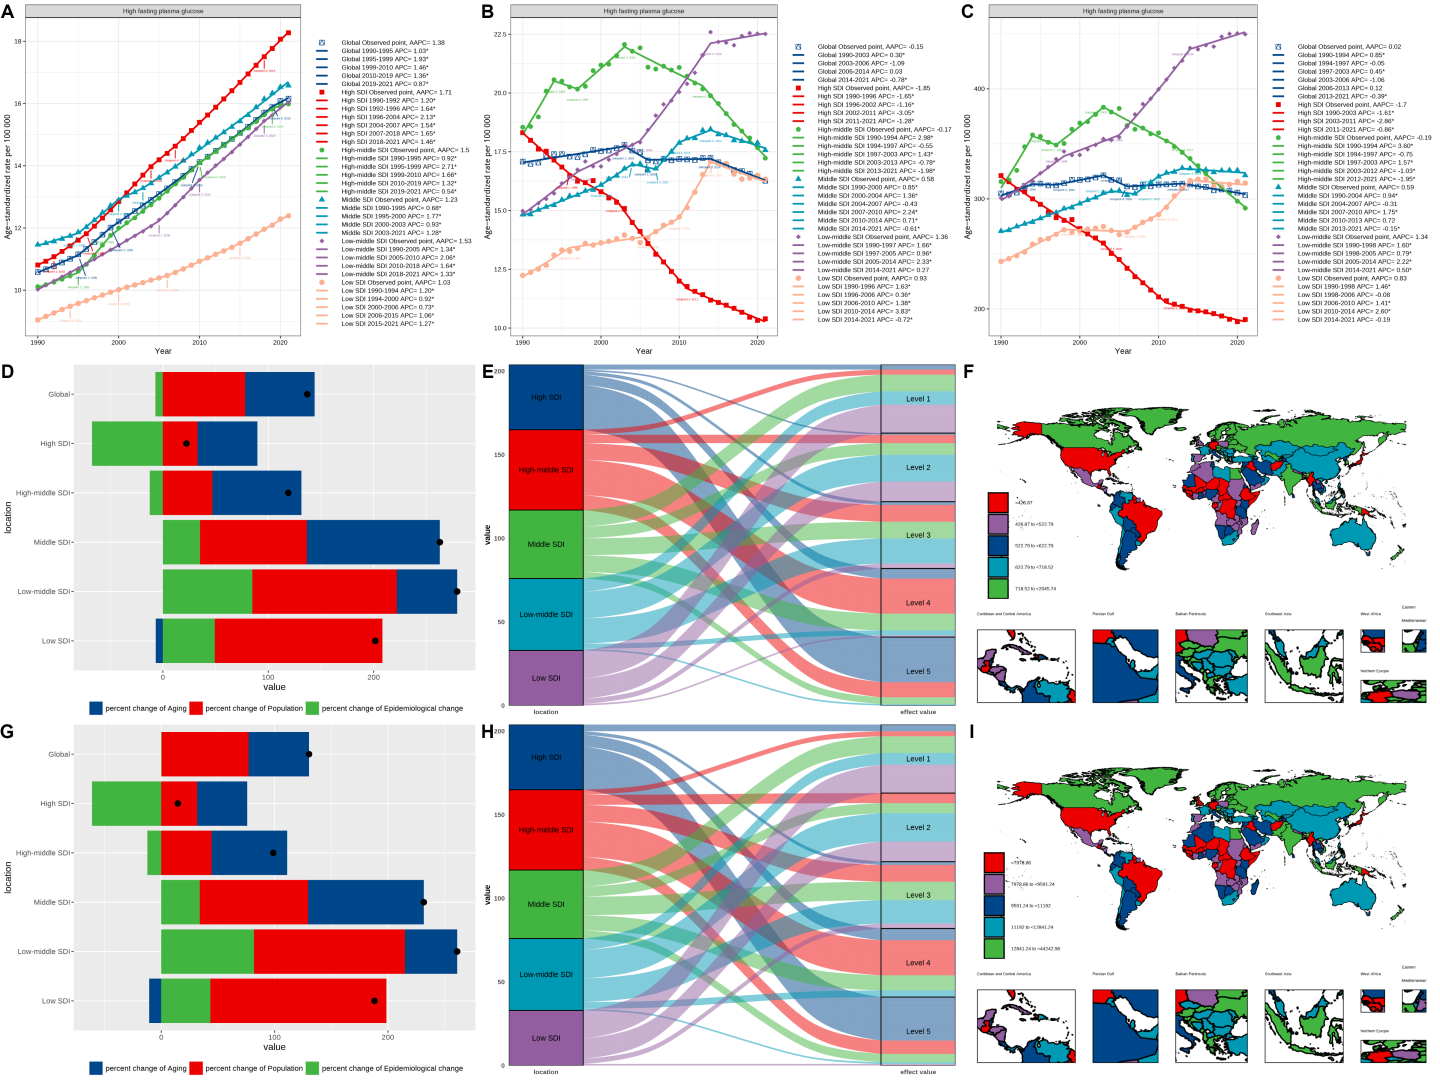


**Figure S24** Summary of analysis results for high LDL cholesterol. (**A)** The joinpoint regression analysis on SEV. (**B)** The joinpoint regression analysis on the ASR of deaths. (**C)** The joinpoint regression analysis on the ASR of DALYs. (**D)** Changes in deaths according to aging, population growth and epidemiological change from 1990 to 2021. (**E)** Changes in DALYs according to aging, population growth and epidemiological change from 1990 to 2021. (**F)** The correspondence between different regions and fixed effects quintiles of stroke related deaths. (**G)** The correspondence between different regions and fixed effects quintiles of stroke related DALYs. (**H)** The fixed-effects of deaths of 204 countries and territories. (**I)** The fixed-effects of DALYs of 204 countries and territories. **Abbreviations:** SEV, summary exposure value; ASR, age-standardized rate; DALYs, disability-adjusted life years.


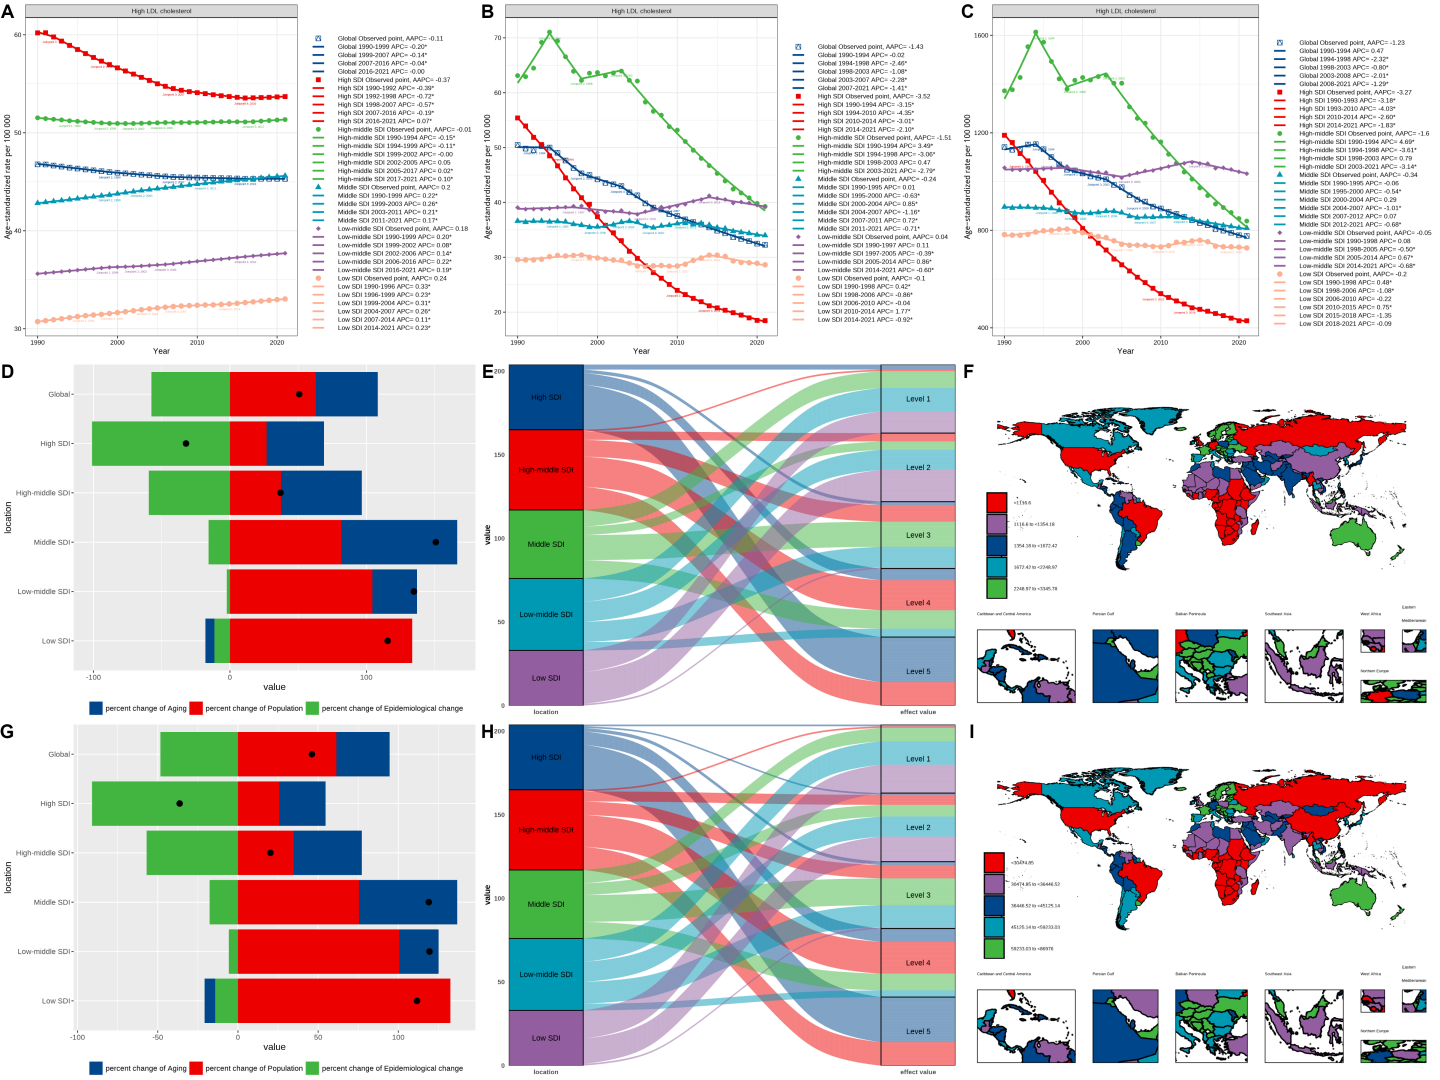


**Figure S25** Summary of analysis results for high body-mass index. (**A)** The joinpoint regression analysis on SEV. (**B)** The joinpoint regression analysis on the ASR of deaths. (**C)** The joinpoint regression analysis on the ASR of DALYs. (**D)** Changes in deaths according to aging, population growth and epidemiological change from 1990 to 2021. (**E)** Changes in DALYs according to aging, population growth and epidemiological change from 1990 to 2021. (**F)** The correspondence between different regions and fixed effects quintiles of stroke related deaths. (**G)** The correspondence between different regions and fixed effects quintiles of stroke related DALYs. (**H)** The fixed-effects of deaths of 204 countries and territories. (**I)** The fixed-effects of DALYs of 204 countries and territories. **Abbreviations:** SEV, summary exposure value; ASR, age-standardized rate; DALYs, disability-adjusted life years.


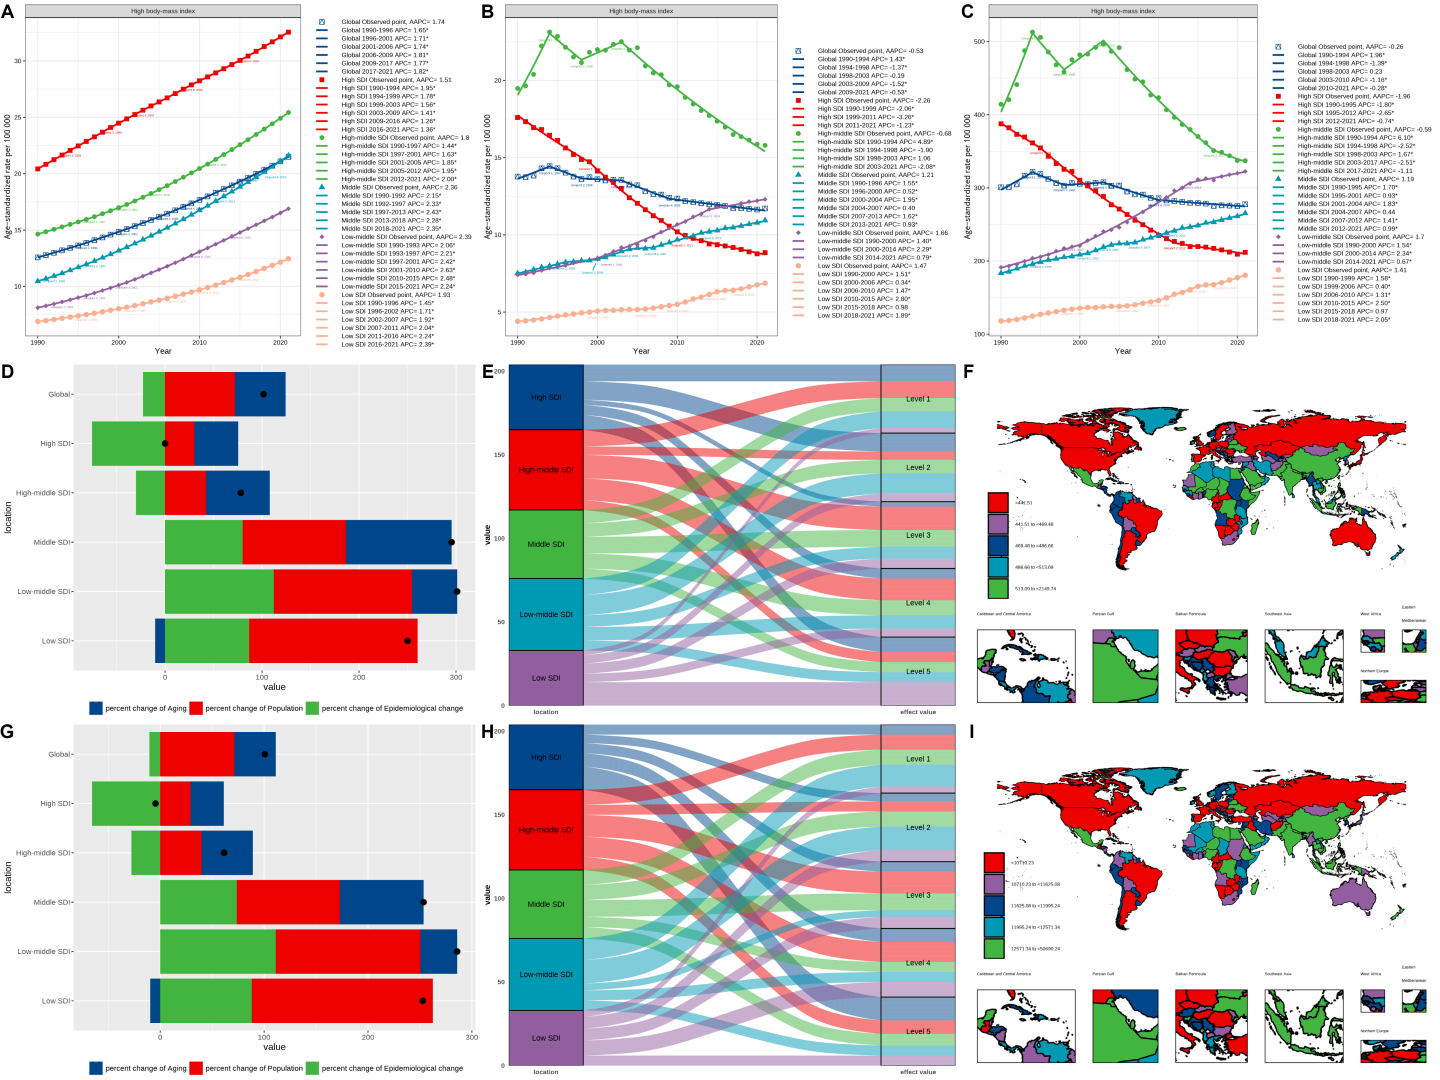


**Figure S26** Summary of analysis results for kidney dysfunction. (**A)** The joinpoint regression analysis on SEV. (**B)** The joinpoint regression analysis on the ASR of deaths. (**C)** The joinpoint regression analysis on the ASR of DALYs. (**D)** Changes in deaths according to aging, population growth and epidemiological change from 1990 to 2021. (**E)** Changes in DALYs according to aging, population growth and epidemiological change from 1990 to 2021. (**F)** The correspondence between different regions and fixed effects quintiles of stroke related deaths. (**G)** The correspondence between different regions and fixed effects quintiles of stroke related DALYs. (**H)** The fixed-effects of deaths of 204 countries and territories. (**I)** The fixed-effects of DALYs of 204 countries and territories. **Abbreviations:** SEV, summary exposure value; ASR, age-standardized rate; DALYs, disability-adjusted life years.


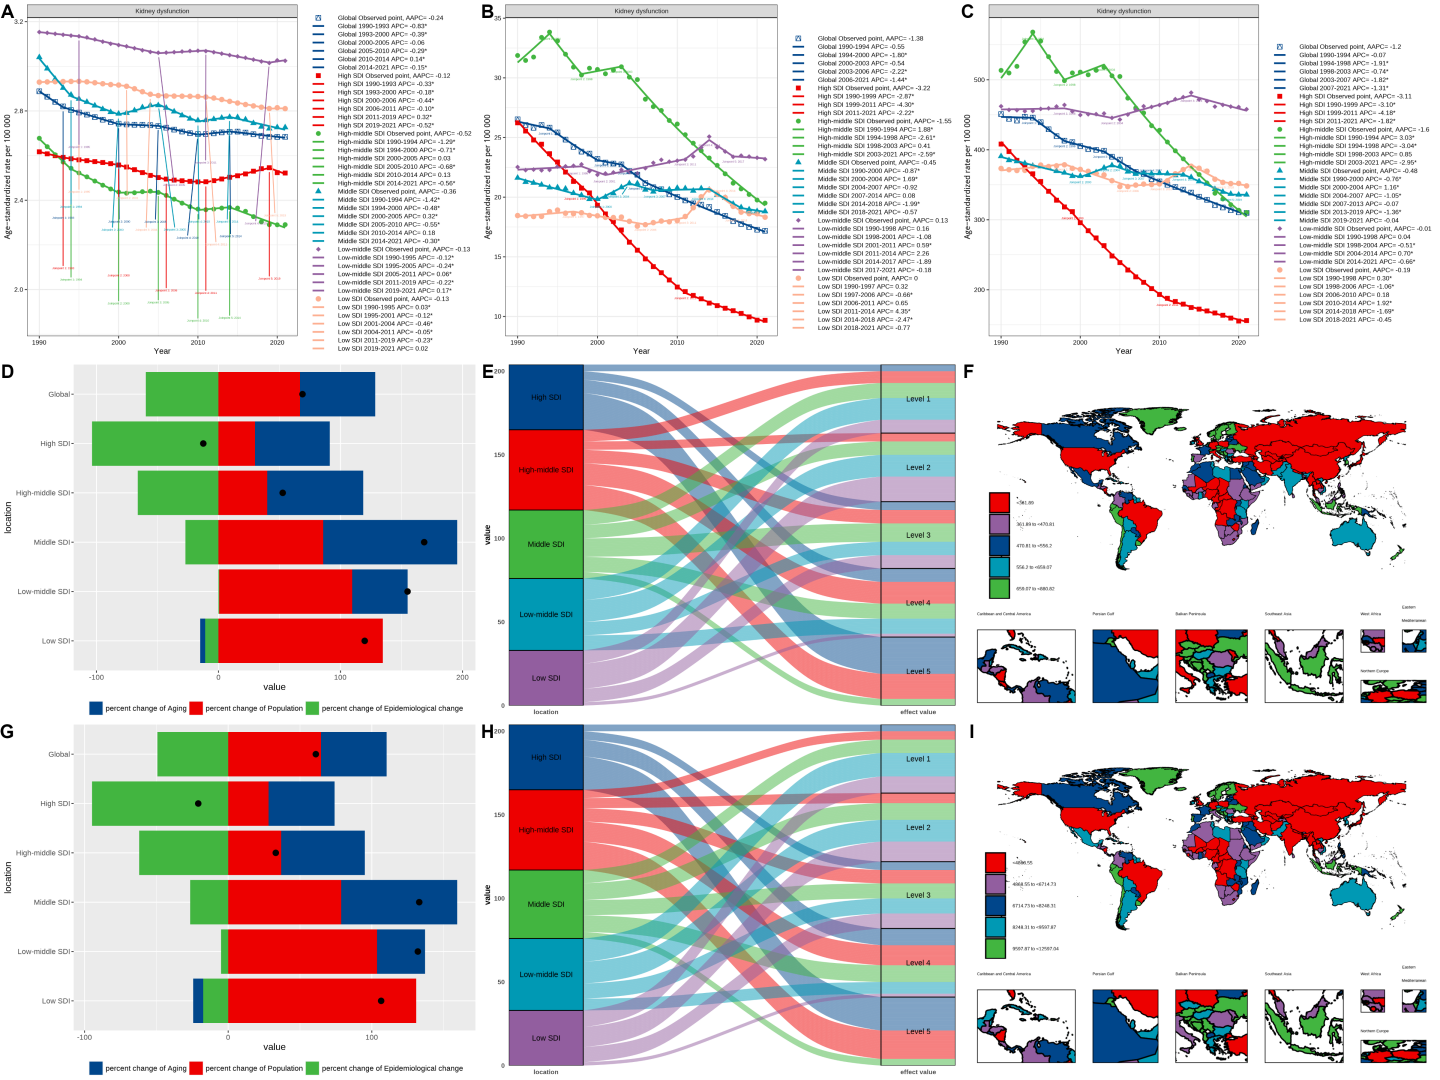

Supplement: Supplementary file 1 [file get_supplementary_file.php]
